# Supplementary material
Source: PubMed Central journal article supplement (PMC3596867)
Supplement: NIHMS430992-supplement-1_si_001.pdf [file NIHMS430992-supplement-1_si_001.pdf]

# Supplemental Materials

## Top-down Targeted Proteomics for Deep Sequencing of Tropomyosin Isoforms

Ying Peng†‡, Xin Chen†‡, Han Zhang†§, Qingge Xu†‡, Timothy A. Hacker¶, Ying Ge†‡§\*

From the †Human Proteomics Program, ‡Department of Cell and Regenerative Biology,

¶Department of Medicine, School of Medicine and Public Health,

§Department of Chemistry,

University of Wisconsin-Madison, Madison, WI, 53706.

Running title: *Top-down proteomics for characterizing Tm*

\*Address correspondence to: Ying Ge, PhD, 1300 University Ave., SMI 130, Madison, WI, 53706. E-mail: ge2@wisc.edu, Tel: 608-263-9212, Fax: 608-265-5512

**Supplemental Tables:**

Supplemental Table 1. Peak list and fragment assignment of one ECD spectrum of un-phosphorylated  $\alpha$ -Tm isoform (precursor ion at  $m/z$  936, 35+, searched with MASH Suite version 1.0 and manually validated)

| Observed monoisotopic $m/z$ | Charge state | Observed monoisotopic mass (Da) | Fragment assignment | Calculated Monoisotopic mass (Da) | Error (ppm) |
|-----------------------------|--------------|---------------------------------|---------------------|-----------------------------------|-------------|
| 618.330                     | 1            | 617.323                         | $c_5$               | 617.321                           | 3.4         |
| 746.425                     | 1            | 745.418                         | $c_6$               | 745.416                           | 3.5         |
| 373.718                     | 2            | 745.421                         | $c_6$               | 745.416                           | 7.7         |
| 503.284                     | 2            | 1004.554                        | $c_8$               | 1004.551                          | 3.2         |
| 567.314                     | 2            | 1132.614                        | $c_9$               | 1132.610                          | 3.4         |
| 632.835                     | 2            | 1263.656                        | $c_{10}$            | 1263.650                          | 4.5         |
| 689.376                     | 2            | 1376.739                        | $c_{11}$            | 1376.734                          | 3.6         |
| 1377.750                    | 1            | 1376.743                        | $c_{11}$            | 1376.734                          | 6.4         |
| 753.424                     | 2            | 1504.835                        | $c_{12}$            | 1504.829                          | 3.7         |
| 540.313                     | 3            | 1617.919                        | $c_{13}$            | 1617.913                          | 3.7         |
| 809.967                     | 2            | 1617.920                        | $c_{13}$            | 1617.913                          | 3.9         |
| 578.655                     | 3            | 1732.946                        | $c_{14}$            | 1732.940                          | 3.1         |
| 466.267                     | 4            | 1861.041                        | $c_{15}$            | 1861.035                          | 3.3         |
| 621.689                     | 3            | 1861.042                        | $c_{15}$            | 1861.035                          | 3.9         |
| 664.703                     | 3            | 1990.086                        | $c_{16}$            | 1990.078                          | 4.0         |
| 702.717                     | 3            | 2104.129                        | $c_{17}$            | 2104.121                          | 3.7         |
| 726.397                     | 3            | 2175.167                        | $c_{18}$            | 2175.158                          | 4.3         |
| 764.091                     | 3            | 2288.251                        | $c_{19}$            | 2288.242                          | 3.8         |
| 602.077                     | 4            | 2403.277                        | $c_{20}$            | 2403.269                          | 3.2         |

|         |   |           |          |          |     |
|---------|---|-----------|----------|----------|-----|
| 802.434 | 3 | 2403.279  | $c_{20}$ | 2403.269 | 4.3 |
| 513.083 | 5 | 2559.378  | $c_{21}$ | 2559.370 | 3.3 |
| 641.102 | 4 | 2559.379  | $c_{21}$ | 2559.370 | 3.6 |
| 527.290 | 5 | 2630.415  | $c_{22}$ | 2630.407 | 3.0 |
| 658.862 | 4 | 2630.416  | $c_{22}$ | 2630.407 | 3.6 |
| 691.122 | 4 | 2759.459  | $c_{23}$ | 2759.450 | 3.4 |
| 553.099 | 5 | 2759.460  | $c_{23}$ | 2759.450 | 3.6 |
| 578.711 | 5 | 2887.512  | $c_{24}$ | 2887.508 | 4.0 |
| 723.138 | 4 | 2887.521  | $c_{24}$ | 2887.508 | 4.3 |
| 592.918 | 5 | 2958.556  | $c_{25}$ | 2958.545 | 3.5 |
| 740.897 | 4 | 2958.557  | $c_{25}$ | 2958.545 | 4.0 |
| 773.157 | 4 | 3087.597  | $c_{26}$ | 3087.588 | 3.0 |
| 618.727 | 5 | 3087.599  | $c_{26}$ | 3087.588 | 3.6 |
| 632.935 | 5 | 3158.6375 | $c_{27}$ | 3158.625 | 3.9 |
| 655.940 | 5 | 3273.664  | $c_{28}$ | 3273.652 | 3.5 |
| 819.674 | 4 | 3273.668  | $c_{28}$ | 3273.652 | 4.8 |
| 851.948 | 4 | 3401.759  | $c_{29}$ | 3401.747 | 3.6 |
| 681.760 | 5 | 3401.760  | $c_{29}$ | 3401.747 | 3.7 |
| 601.489 | 6 | 3600.887  | $c_{31}$ | 3600.879 | 2.1 |
| 721.587 | 5 | 3600.894  | $c_{31}$ | 3600.879 | 4.2 |
| 613.329 | 6 | 3671.925  | $c_{32}$ | 3671.916 | 2.5 |
| 735.794 | 5 | 3671.931  | $c_{32}$ | 3671.916 | 4.1 |
| 634.836 | 6 | 3800.972  | $c_{33}$ | 3800.959 | 3.5 |
| 761.602 | 5 | 3800.973  | $c_{33}$ | 3800.959 | 3.8 |

|          |   |          |                 |          |     |
|----------|---|----------|-----------------|----------|-----|
| 951.753  | 4 | 3800.980 | c <sub>33</sub> | 3800.959 | 5.6 |
| 784.607  | 5 | 3915.993 | c <sub>34</sub> | 3915.986 | 1.9 |
| 654.008  | 6 | 3916.000 | c <sub>34</sub> | 3915.986 | 3.5 |
| 815.828  | 5 | 4072.100 | c <sub>35</sub> | 4072.087 | 3.3 |
| 680.0245 | 6 | 4072.101 | c <sub>35</sub> | 4072.087 | 3.5 |
| 858.854  | 5 | 4287.228 | c <sub>37</sub> | 4287.214 | 3.4 |
| 715.879  | 6 | 4287.231 | c <sub>37</sub> | 4287.214 | 3.9 |
| 632.049  | 7 | 4415.288 | c <sub>38</sub> | 4415.272 | 3.5 |
| 737.222  | 6 | 4415.288 | c <sub>38</sub> | 4415.272 | 3.6 |
| 648.203  | 7 | 4528.372 | c <sub>39</sub> | 4528.356 | 3.4 |
| 756.070  | 6 | 4528.373 | c <sub>39</sub> | 4528.356 | 3.7 |
| 666.638  | 7 | 4657.415 | c <sub>40</sub> | 4657.399 | 3.4 |
| 777.577  | 6 | 4657.417 | c <sub>40</sub> | 4657.399 | 3.9 |
| 683.071  | 7 | 4772.441 | c <sub>41</sub> | 4772.426 | 3.3 |
| 955.897  | 5 | 4772.446 | c <sub>41</sub> | 4772.426 | 4.3 |
| 796.749  | 6 | 4772.447 | c <sub>41</sub> | 4772.426 | 4.4 |
| 818.422  | 6 | 4901.487 | c <sub>42</sub> | 4901.468 | 3.7 |
| 731.955  | 7 | 5113.631 | c <sub>44</sub> | 5113.621 | 1.9 |
| 744.389  | 7 | 5200.671 | c <sub>45</sub> | 5200.653 | 3.5 |
| 651.467  | 8 | 5200.672 | c <sub>45</sub> | 5200.653 | 3.5 |
| 868.287  | 6 | 5200.674 | c <sub>45</sub> | 5200.653 | 4.0 |
| 681.608  | 8 | 5441.806 | c <sub>47</sub> | 5441.796 | 1.9 |
| 908.477  | 6 | 5441.811 | c <sub>47</sub> | 5441.796 | 2.9 |
| 778.839  | 7 | 5441.816 | c <sub>47</sub> | 5441.796 | 3.8 |

|          |    |          |                 |          |     |
|----------|----|----------|-----------------|----------|-----|
| 697.621  | 8  | 5569.904 | c <sub>48</sub> | 5569.891 | 2.3 |
| 797.1381 | 7  | 5569.912 | c <sub>48</sub> | 5569.891 | 3.8 |
| 713.633  | 8  | 5698.004 | c <sub>49</sub> | 5697.986 | 3.2 |
| 634.453  | 9  | 5698.009 | c <sub>49</sub> | 5697.986 | 4.1 |
| 815.438  | 7  | 5698.011 | c <sub>49</sub> | 5697.986 | 4.5 |
| 727.768  | 8  | 5811.081 | c <sub>50</sub> | 5811.070 | 2.0 |
| 680.371  | 9  | 6111.271 | c <sub>53</sub> | 6111.250 | 3.5 |
| 765.292  | 8  | 6111.273 | c <sub>53</sub> | 6111.250 | 3.8 |
| 874.476  | 7  | 6111.279 | c <sub>53</sub> | 6111.249 | 4.8 |
| 694.709  | 9  | 6240.314 | c <sub>54</sub> | 6240.292 | 3.5 |
| 781.423  | 8  | 6240.318 | c <sub>54</sub> | 6240.292 | 4.2 |
| 707.490  | 9  | 6355.341 | c <sub>55</sub> | 6355.319 | 3.5 |
| 909.343  | 7  | 6355.343 | c <sub>55</sub> | 6355.319 | 3.8 |
| 795.801  | 8  | 6355.344 | c <sub>55</sub> | 6355.319 | 3.9 |
| 721.828  | 9  | 6484.386 | c <sub>56</sub> | 6484.361 | 3.7 |
| 812.057  | 8  | 6484.388 | c <sub>56</sub> | 6484.361 | 4.1 |
| 661.154  | 10 | 6597.462 | c <sub>57</sub> | 6597.446 | 2.5 |
| 734.504  | 9  | 6597.468 | c <sub>57</sub> | 6597.446 | 3.5 |
| 826.192  | 8  | 6597.470 | c <sub>57</sub> | 6597.446 | 3.7 |
| 840.569  | 8  | 6712.491 | c <sub>58</sub> | 6712.472 | 2.7 |
| 645.979  | 11 | 7090.687 | c <sub>61</sub> | 7090.3   | 3.4 |
| 710.477  | 10 | 7090.690 | c <sub>61</sub> | 7090.663 | 3.8 |
| 789.307  | 9  | 7090.693 | c <sub>61</sub> | 7090.663 | 4.3 |
| 887.845  | 8  | 7090.695 | c <sub>61</sub> | 7090.663 | 4.5 |

|          |    |             |          |          |     |
|----------|----|-------------|----------|----------|-----|
| 723.381  | 10 | 7219.727    | $c_{62}$ | 7219.705 | 3.0 |
| 803.645  | 9  | 7219.736    | $c_{62}$ | 7219.705 | 4.2 |
| 811.537  | 9  | 7290.761    | $c_{63}$ | 7290.742 | 2.6 |
| 730.485  | 10 | 7290.772    | $c_{63}$ | 7290.742 | 4.0 |
| 674.448  | 11 | 7403.845    | $c_{64}$ | 7403.827 | 2.6 |
| 741.792  | 10 | 7403.846    | $c_{64}$ | 7403.827 | 2.6 |
| 824.1027 | 9  | 7403.847    | $c_{64}$ | 7403.827 | 2.7 |
| 754.602  | 10 | 7531.948    | $c_{65}$ | 7531.921 | 3.6 |
| 686.0944 | 11 | 7531.954    | $c_{65}$ | 7531.921 | 4.4 |
| 766.105  | 10 | 7646.973    | $c_{66}$ | 7646.948 | 3.2 |
| 773.209  | 10 | 7718.016    | $c_{67}$ | 7717.986 | 3.9 |
| 859.010  | 9  | 7718.019    | $c_{67}$ | 7717.986 | 4.3 |
| 703.010  | 11 | 7718.024    | $c_{67}$ | 7717.986 | 4.9 |
| 982.268  | 8  | 7846.075    | $c_{68}$ | 7846.044 | 4.0 |
| 786.016  | 10 | 7846.078    | $c_{68}$ | 7846.044 | 4.4 |
| 873.239  | 9  | 7846.079    | $c_{68}$ | 7846.044 | 4.4 |
| 1122.449 | 7  | 7846.082    | $c_{68}$ | 7846.044 | 4.8 |
| 836.042  | 10 | 8345.336    | $c_{72}$ | 8345.308 | 3.4 |
| 760.130  | 11 | 8345.345    | $c_{72}$ | 8345.308 | 4.4 |
| 706.293  | 12 | 8458.422    | $c_{73}$ | 8458.392 | 3.5 |
| 770.410  | 11 | 8458.423    | $c_{73}$ | 8458.392 | 3.6 |
| 847.351  | 10 | 8458.427131 | $c_{73}$ | 8458.392 | 4.1 |
| 776.868  | 11 | 8529.458    | $c_{74}$ | 8529.429 | 3.3 |
| 854.454  | 10 | 8529.459    | $c_{74}$ | 8529.429 | 3.4 |

|          |    |           |                 |           |     |
|----------|----|-----------|-----------------|-----------|-----|
| 867.359  | 10 | 8658.508  | c <sub>75</sub> | 8658.472  | 4.1 |
| 733.641  | 12 | 8786.593  | c <sub>76</sub> | 8786.567  | 3.0 |
| 800.245  | 11 | 8786.603  | c <sub>76</sub> | 8786.567  | 4.0 |
| 758.656  | 12 | 9086.774  | c <sub>79</sub> | 9086.747  | 3.0 |
| 827.534  | 11 | 9086.787  | c <sub>79</sub> | 9086.747  | 4.5 |
| 700.376  | 13 | 9086.789  | c <sub>79</sub> | 9086.747  | 4.6 |
| 910.187  | 10 | 9086.794  | c <sub>79</sub> | 9086.747  | 5.1 |
| 709.223  | 13 | 9201.795  | c <sub>80</sub> | 9201.774  | 2.3 |
| 768.241  | 12 | 9201.801  | c <sub>80</sub> | 9201.774  | 2.9 |
| 837.991  | 11 | 9201.813  | c <sub>80</sub> | 9201.774  | 4.2 |
| 714.688  | 13 | 9272.843  | c <sub>81</sub> | 9272.811  | 3.4 |
| 774.162  | 12 | 9272.845  | c <sub>81</sub> | 9272.811  | 3.7 |
| 784.914  | 12 | 9401.871  | c <sub>82</sub> | 9401.853  | 1.9 |
| 856.181  | 11 | 9401.901  | c <sub>82</sub> | 9401.853  | 5.0 |
| 790.835  | 12 | 9472.925  | c <sub>83</sub> | 9472.891  | 3.7 |
| 678.004  | 14 | 9472.950  | c <sub>83</sub> | 9472.891  | 6.3 |
| 821.932  | 12 | 9845.083  | c <sub>87</sub> | 9845.055  | 2.9 |
| 767.482  | 13 | 9958.158  | c <sub>88</sub> | 9958.139  | 1.9 |
| 712.734  | 14 | 9958.170  | c <sub>88</sub> | 9958.139  | 3.1 |
| 906.843  | 11 | 9958.179  | c <sub>88</sub> | 9958.139  | 4.0 |
| 997.427  | 10 | 9958.183  | c <sub>88</sub> | 9958.139  | 4.6 |
| 776.255  | 13 | 10072.218 | c <sub>89</sub> | 10072.182 | 3.5 |
| 720.881  | 14 | 10072.218 | c <sub>89</sub> | 10072.182 | 3.6 |
| 1008.830 | 10 | 10072.219 | c <sub>89</sub> | 10072.182 | 3.7 |

|          |    |           |                 |           |     |
|----------|----|-----------|-----------------|-----------|-----|
| 840.860  | 12 | 10072.222 | c <sub>89</sub> | 10072.182 | 4.0 |
| 917.210  | 11 | 10072.225 | c <sub>89</sub> | 10072.182 | 4.2 |
| 1120.813 | 9  | 10072.239 | c <sub>89</sub> | 10072.182 | 5.6 |
| 788.264  | 13 | 10228.323 | c <sub>90</sub> | 10228.283 | 3.9 |
| 800.271  | 13 | 10384.424 | c <sub>91</sub> | 10384.384 | 3.8 |
| 866.878  | 12 | 10384.435 | c <sub>91</sub> | 10384.384 | 4.9 |
| 808.970  | 13 | 10497.508 | c <sub>92</sub> | 10497.468 | 3.8 |
| 709.779  | 15 | 10625.565 | c <sub>93</sub> | 10625.527 | 3.6 |
| 818.821  | 13 | 10625.566 | c <sub>93</sub> | 10625.527 | 3.8 |
| 886.9727 | 12 | 10625.572 | c <sub>93</sub> | 10625.527 | 4.3 |
| 760.406  | 14 | 10625.581 | c <sub>93</sub> | 10625.527 | 5.1 |
| 723.922  | 15 | 10837.715 | c <sub>95</sub> | 10837.679 | 3.3 |
| 904.651  | 12 | 10837.718 | c <sub>95</sub> | 10837.679 | 3.5 |
| 775.559  | 14 | 10837.721 | c <sub>95</sub> | 10837.679 | 3.8 |
| 835.141  | 13 | 10837.727 | c <sub>95</sub> | 10837.679 | 4.4 |
| 686.805  | 16 | 10966.755 | c <sub>96</sub> | 10966.722 | 3.0 |
| 732.525  | 15 | 10966.757 | c <sub>96</sub> | 10966.722 | 3.2 |
| 784.777  | 14 | 10966.762 | c <sub>96</sub> | 10966.722 | 3.6 |
| 845.067  | 13 | 10966.767 | c <sub>96</sub> | 10966.722 | 4.1 |
| 915.406  | 12 | 10966.776 | c <sub>96</sub> | 10966.722 | 4.9 |
| 793.994  | 14 | 11095.813 | c <sub>97</sub> | 11095.765 | 4.3 |
| 854.994  | 13 | 11095.814 | c <sub>97</sub> | 11095.765 | 4.4 |
| 926.161  | 12 | 11095.832 | c <sub>97</sub> | 11095.765 | 6.1 |
| 749.798  | 15 | 11224.851 | c <sub>98</sub> | 11224.807 | 3.9 |



|          |    |           |           |           |      |
|----------|----|-----------|-----------|-----------|------|
| 803.283  | 14 | 11224.852 | $c_{98}$  | 11224.807 | 4.0  |
| 864.997  | 13 | 11224.854 | $c_{98}$  | 11224.807 | 4.2  |
| 882.542  | 13 | 11452.946 | $c_{100}$ | 11452.918 | 2.4  |
| 819.577  | 14 | 11452.962 | $c_{100}$ | 11452.918 | 3.8  |
| 900.0172 | 13 | 11680.120 | $c_{102}$ | 11680.056 | 5.4  |
| 747.520  | 16 | 11937.196 | $c_{104}$ | 11937.158 | 3.3  |
| 854.165  | 14 | 11937.200 | $c_{104}$ | 11937.158 | 3.6  |
| 797.288  | 15 | 11937.203 | $c_{104}$ | 11937.158 | 3.8  |
| 996.360  | 12 | 11937.220 | $c_{104}$ | 11937.158 | 5.2  |
| 940.494  | 13 | 12206.317 | $c_{106}$ | 12206.343 | -2.1 |
| 885.683  | 14 | 12378.449 | $c_{108}$ | 12378.427 | 1.8  |
| 775.100  | 16 | 12378.475 | $c_{108}$ | 12378.427 | 3.8  |
| 826.707  | 15 | 12378.480 | $c_{108}$ | 12378.427 | 4.2  |
| 831.440  | 15 | 12449.486 | $c_{109}$ | 12449.465 | 1.7  |
| 890.759  | 14 | 12449.515 | $c_{109}$ | 12449.465 | 4.1  |
| 779.540  | 16 | 12449.519 | $c_{109}$ | 12449.465 | 4.4  |
| 898.837  | 14 | 12562.601 | $c_{110}$ | 12562.549 | 4.2  |
| 908.056  | 14 | 12690.671 | $c_{111}$ | 12690.607 | 5.1  |
| 863.666  | 15 | 12931.865 | $c_{113}$ | 12931.786 | 6.1  |
| 817.812  | 16 | 13060.871 | $c_{114}$ | 13060.829 | 3.2  |
| 769.765  | 17 | 13060.873 | $c_{114}$ | 13060.829 | 3.4  |
| 872.267  | 15 | 13060.886 | $c_{114}$ | 13060.829 | 4.4  |
| 781.536  | 17 | 13260.970 | $c_{116}$ | 13260.909 | 4.6  |
| 838.383  | 16 | 13390.002 | $c_{117}$ | 13389.951 | 3.8  |

|         |    |           |           |            |     |
|---------|----|-----------|-----------|------------|-----|
| 958.009 | 14 | 13390.013 | $c_{117}$ | 13389.951  | 4.6 |
| 894.209 | 15 | 13390.020 | $c_{117}$ | 13389.951  | 5.2 |
| 726.438 | 19 | 13775.178 | $c_{121}$ | 13775.147  | 2.2 |
| 811.784 | 17 | 13775.197 | $c_{121}$ | 13775.147  | 3.6 |
| 766.741 | 18 | 13775.197 | $c_{121}$ | 13775.147  | 3.6 |
| 862.459 | 16 | 13775.210 | $c_{121}$ | 13775.147  | 4.6 |
| 870.523 | 16 | 13904.234 | $c_{122}$ | 13904.190  | 3.2 |
| 819.375 | 17 | 13904.247 | $c_{122}$ | 13904.190  | 4.1 |
| 785.911 | 18 | 14120.305 | $c_{124}$ | 14120.264  | 2.9 |
| 884.027 | 16 | 14120.309 | $c_{124}$ | 14120.264  | 3.1 |
| 744.603 | 19 | 14120.312 | $c_{124}$ | 14120.264  | 3.4 |
| 832.086 | 17 | 14120.325 | $c_{124}$ | 14120.264  | 4.3 |
| 1010.17 | 14 | 14120.332 | $c_{124}$ | 14120.264  | 4.8 |
| 859.924 | 17 | 14592.578 | $c_{128}$ | 14592.5228 | 3.8 |
| 865.752 | 17 | 14691.653 | $c_{129}$ | 14691.591  | 4.2 |
| 823.992 | 18 | 14804.717 | $c_{130}$ | 14804.675  | 2.8 |
| 872.403 | 17 | 14804.717 | $c_{130}$ | 14804.675  | 2.9 |
| 780.678 | 19 | 14804.723 | $c_{130}$ | 14804.675  | 3.2 |
| 926.867 | 16 | 14804.735 | $c_{130}$ | 14804.675  | 4.0 |
| 879.994 | 17 | 14933.769 | $c_{131}$ | 14933.718  | 3.4 |
| 787.470 | 19 | 14933.786 | $c_{131}$ | 14933.718  | 4.6 |
| 885.115 | 17 | 15020.818 | $c_{132}$ | 15020.750  | 4.6 |
| 792.051 | 19 | 15020.820 | $c_{132}$ | 15020.750  | 4.7 |
| 906.008 | 17 | 15376.001 | $c_{135}$ | 15375.946  | 3.6 |

|          |    |            |           |            |     |
|----------|----|------------|-----------|------------|-----|
| 855.731  | 18 | 15376.004  | $c_{135}$ | 15375.946  | 3.8 |
| 810.746  | 19 | 15376.029  | $c_{135}$ | 15375.946  | 5.4 |
| 739.727  | 21 | 15504.100  | $c_{136}$ | 15504.041  | 3.8 |
| 817.487  | 19 | 15504.108  | $c_{136}$ | 15504.041  | 4.3 |
| 913.546  | 17 | 15504.137  | $c_{136}$ | 15504.0413 | 6.2 |
| 869.237  | 18 | 15619.128  | $c_{137}$ | 15619.068  | 3.8 |
| 823.541  | 19 | 15619.128  | $c_{137}$ | 15619.068  | 3.8 |
| 782.414  | 20 | 15619.130  | $c_{137}$ | 15619.068  | 4.0 |
| 920.311  | 17 | 15619.147  | $c_{137}$ | 15619.068  | 5.0 |
| 830.385  | 19 | 15748.163  | $c_{138}$ | 15748.111  | 3.3 |
| 876.463  | 18 | 15748.187  | $c_{138}$ | 15748.111  | 4.8 |
| 833.287  | 20 | 16635.586  | $c_{145}$ | 16635.517  | 4.2 |
| 877.092  | 19 | 16635.594  | $c_{145}$ | 16635.517  | 4.7 |
| 850.998  | 20 | 16989.799  | $c_{148}$ | 16989.743  | 3.2 |
| 895.736  | 19 | 16989.828  | $c_{148}$ | 16989.743  | 5.0 |
| 816.622  | 21 | 17117.903  | $c_{149}$ | 17117.838  | 3.8 |
| 857.404  | 20 | 17117.918  | $c_{149}$ | 17117.838  | 4.7 |
| 896.373  | 20 | 17896.288  | $c_{156}$ | 17896.236  | 2.9 |
| 853.737  | 21 | 17896.313  | $c_{156}$ | 17896.236  | 4.4 |
| 905.6756 | 20 | 18082.3456 | $c_{158}$ | 18082.300  | 2.5 |
| 828.662  | 22 | 18197.397  | $c_{159}$ | 18197.327  | 3.9 |
| 868.075  | 21 | 18197.400  | $c_{159}$ | 18197.327  | 4.0 |
| 959.345  | 19 | 18197.402  | $c_{159}$ | 18197.327  | 4.2 |
| 911.429  | 20 | 18197.424  | $c_{159}$ | 18197.327  | 5.4 |

|          |    |           |           |           |     |
|----------|----|-----------|-----------|-----------|-----|
| 875.508  | 21 | 18353.504 | $c_{160}$ | 18353.428 | 4.2 |
| 944.216  | 21 | 19795.371 | $c_{172}$ | 19795.293 | 3.9 |
| 901.344  | 22 | 19795.384 | $c_{172}$ | 19795.293 | 4.6 |
| 856.745  | 24 | 20524.693 | $c_{178}$ | 20524.623 | 3.4 |
| 865.082  | 24 | 20724.782 | $c_{180}$ | 20724.702 | 3.9 |
| 1342.614 | 1  | 1341.607  | $z_{12}$  | 1341.600  | 5.6 |
| 871.185  | 4  | 3478.708  | $z_{30}$  | 3478.694  | 3.9 |
| 1161.246 | 3  | 3478.711  | $z_{30}$  | 3478.694  | 4.9 |
| 1308.994 | 3  | 3921.955  | $z_{34}$  | 3921.932  | 5.9 |
| 1352.008 | 3  | 4050.999  | $z_{35}$  | 4050.974  | 6.0 |
| 1389.702 | 3  | 4164.079  | $z_{36}$  | 4164.059  | 4.9 |
| 1074.551 | 4  | 4292.170  | $z_{37}$  | 4292.154  | 3.8 |
| 1432.402 | 3  | 4292.181  | $z_{37}$  | 4292.154  | 6.4 |
| 1528.120 | 3  | 4579.333  | $z_{40}$  | 4579.302  | 6.8 |
| 1185.364 | 4  | 4735.424  | $z_{41}$  | 4735.403  | 4.6 |
| 1235.635 | 4  | 4935.505  | $z_{43}$  | 4935.482  | 4.6 |
| 1272.406 | 4  | 5082.590  | $z_{44}$  | 5082.551  | 7.6 |
| 1304.664 | 4  | 5211.621  | $z_{45}$  | 5211.593  | 5.3 |
| 907.968  | 6  | 5438.758  | $z_{47}$  | 5438.732  | 4.8 |
| 1361.451 | 4  | 5438.769  | $z_{47}$  | 5438.732  | 6.8 |
| 1149.583 | 5  | 5739.874  | $z_{50}$  | 5739.859  | 2.6 |
| 1436.732 | 4  | 5739.893  | $z_{50}$  | 5739.859  | 5.9 |
| 1175.395 | 5  | 5868.931  | $z_{51}$  | 5868.902  | 5.0 |
| 1468.993 | 4  | 5868.936  | $z_{51}$  | 5868.902  | 5.9 |

|          |   |          |          |          |     |
|----------|---|----------|----------|----------|-----|
| 1272.258 | 5 | 6353.250 | $z_{55}$ | 6353.203 | 7.5 |
| 1590.072 | 4 | 6353.252 | $z_{55}$ | 6353.203 | 7.8 |
| 1312.482 | 5 | 6553.363 | $z_{57}$ | 6553.319 | 6.8 |
| 1131.761 | 6 | 6780.517 | $z_{59}$ | 6780.482 | 5.2 |
| 1193.625 | 6 | 7151.698 | $z_{62}$ | 7151.651 | 6.5 |
| 1215.132 | 6 | 7280.742 | $z_{63}$ | 7280.694 | 6.6 |
| 1282.828 | 6 | 7686.918 | $z_{66}$ | 7686.879 | 5.0 |
| 1136.444 | 7 | 7944.052 | $z_{68}$ | 7944.017 | 4.4 |
| 1325.684 | 6 | 7944.053 | $z_{68}$ | 7944.017 | 4.5 |
| 1010.646 | 8 | 8072.099 | $z_{69}$ | 8072.075 | 3.0 |
| 1154.883 | 7 | 8072.118 | $z_{69}$ | 8072.075 | 5.3 |
| 1347.197 | 6 | 8072.125 | $z_{69}$ | 8072.075 | 6.2 |
| 1190.610 | 7 | 8322.210 | $z_{71}$ | 8322.171 | 4.7 |
| 1388.878 | 6 | 8322.217 | $z_{71}$ | 8322.171 | 5.6 |
| 1208.911 | 7 | 8450.316 | $z_{72}$ | 8450.266 | 6.0 |
| 1410.230 | 6 | 8450.327 | $z_{72}$ | 8450.266 | 7.3 |
| 1227.345 | 7 | 8579.355 | $z_{73}$ | 8579.308 | 5.5 |
| 1237.493 | 7 | 8650.387 | $z_{74}$ | 8650.345 | 4.9 |
| 1098.936 | 8 | 8778.423 | $z_{75}$ | 8778.404 | 2.2 |
| 1255.789 | 7 | 8778.460 | $z_{75}$ | 8778.404 | 6.5 |
| 1107.818 | 8 | 8849.479 | $z_{76}$ | 8849.441 | 4.3 |
| 1265.940 | 7 | 8849.517 | $z_{76}$ | 8849.441 | 8.6 |
| 1284.370 | 7 | 8978.530 | $z_{77}$ | 8978.483 | 5.2 |
| 1123.950 | 8 | 8978.533 | $z_{77}$ | 8978.483 | 5.6 |

|          |    |           |           |           |     |
|----------|----|-----------|-----------|-----------|-----|
| 1179.111 | 8  | 9419.824  | $z_{81}$  | 9419.779  | 4.8 |
| 1048.211 | 9  | 9419.828  | $z_{81}$  | 9419.779  | 5.3 |
| 1347.414 | 7  | 9419.837  | $z_{81}$  | 9419.779  | 6.2 |
| 1363.847 | 7  | 9533.864  | $z_{82}$  | 9533.822  | 4.5 |
| 1193.494 | 8  | 9533.884  | $z_{82}$  | 9533.822  | 6.5 |
| 1207.748 | 8  | 9647.916  | $z_{83}$  | 9647.864  | 5.3 |
| 1380.142 | 7  | 9647.931  | $z_{83}$  | 9647.864  | 6.9 |
| 1133.926 | 9  | 10190.259 | $z_{88}$  | 10190.207 | 5.0 |
| 1148.264 | 9  | 10319.299 | $z_{89}$  | 10319.250 | 4.8 |
| 1291.671 | 8  | 10319.300 | $z_{89}$  | 10319.250 | 4.9 |
| 1033.539 | 10 | 10319.303 | $z_{89}$  | 10319.250 | 5.1 |
| 939.673  | 11 | 10319.315 | $z_{89}$  | 10319.250 | 6.3 |
| 1132.479 | 10 | 11307.706 | $z_{98}$  | 11307.667 | 3.5 |
| 1141.184 | 10 | 11394.753 | $z_{99}$  | 11394.699 | 4.8 |
| 1280.435 | 9  | 11507.839 | $z_{100}$ | 11507.783 | 4.8 |
| 1152.493 | 10 | 11507.841 | $z_{100}$ | 11507.783 | 5.1 |
| 1001.012 | 12 | 11993.049 | $z_{104}$ | 11993.006 | 3.6 |
| 1091.923 | 11 | 11993.060 | $z_{104}$ | 11993.006 | 4.5 |
| 1334.349 | 9  | 11993.063 | $z_{104}$ | 11993.006 | 4.7 |
| 1201.015 | 10 | 11993.069 | $z_{104}$ | 11993.006 | 5.2 |
| 1110.113 | 11 | 12193.149 | $z_{106}$ | 12193.086 | 5.2 |
| 1221.024 | 10 | 12193.149 | $z_{106}$ | 12193.086 | 5.2 |
| 1156.864 | 11 | 12706.405 | $z_{110}$ | 12706.341 | 5.1 |
| 1176.504 | 11 | 12922.450 | $z_{112}$ | 12922.415 | 2.7 |

|          |    |           |           |           |     |
|----------|----|-----------|-----------|-----------|-----|
| 1078.548 | 12 | 12922.474 | $z_{112}$ | 12922.415 | 4.5 |
| 1294.059 | 10 | 12922.505 | $z_{112}$ | 12922.415 | 6.9 |
| 1186.788 | 11 | 13035.573 | $z_{113}$ | 13035.500 | 5.6 |
| 1305.366 | 10 | 13035.575 | $z_{113}$ | 13035.500 | 5.8 |
| 1197.068 | 11 | 13148.651 | $z_{114}$ | 13148.584 | 5.1 |
| 1188.028 | 12 | 14236.235 | $z_{123}$ | 14236.186 | 3.4 |
| 1198.786 | 12 | 14364.330 | $z_{124}$ | 14364.281 | 3.4 |
| 1307.679 | 11 | 14364.372 | $z_{124}$ | 14364.281 | 6.3 |
| 1118.659 | 13 | 14520.450 | $z_{125}$ | 14520.382 | 4.6 |
| 1211.796 | 12 | 14520.452 | $z_{125}$ | 14520.382 | 4.8 |
| 1038.827 | 14 | 14520.458 | $z_{125}$ | 14520.382 | 5.2 |
| 1236.887 | 12 | 14821.544 | $z_{128}$ | 14821.473 | 4.8 |
| 1141.820 | 13 | 14821.552 | $z_{128}$ | 14821.473 | 5.3 |
| 1301.755 | 12 | 15599.962 | $z_{135}$ | 15599.871 | 5.8 |
| 1201.698 | 13 | 15599.962 | $z_{135}$ | 15599.871 | 5.9 |
| 1125.083 | 14 | 15728.050 | $z_{136}$ | 15727.966 | 5.4 |
| 1050.146 | 15 | 15728.058 | $z_{136}$ | 15727.966 | 5.9 |
| 1150.456 | 14 | 16082.262 | $z_{139}$ | 16082.192 | 4.3 |
| 1342.035 | 12 | 16082.315 | $z_{139}$ | 16082.192 | 7.6 |
| 1132.985 | 15 | 16969.646 | $z_{146}$ | 16969.598 | 2.9 |
| 1062.238 | 16 | 16969.673 | $z_{146}$ | 16969.598 | 4.4 |
| 1141.588 | 15 | 17098.699 | $z_{147}$ | 17098.641 | 3.4 |
| 1070.303 | 16 | 17098.712 | $z_{147}$ | 17098.641 | 4.2 |
| 1223.060 | 14 | 17098.721 | $z_{147}$ | 17098.641 | 4.7 |

|          |    |           |           |           |     |
|----------|----|-----------|-----------|-----------|-----|
| 1007.404 | 17 | 17098.725 | $z_{147}$ | 17098.641 | 5.0 |
| 1317.068 | 13 | 17098.765 | $z_{147}$ | 17098.641 | 7.2 |
| 1231.278 | 14 | 17213.776 | $z_{148}$ | 17213.668 | 6.3 |
| 1240.498 | 14 | 17341.852 | $z_{149}$ | 17341.763 | 5.2 |
| 1157.867 | 15 | 17341.873 | $z_{149}$ | 17341.763 | 6.4 |
| 1171.136 | 15 | 17540.909 | $z_{151}$ | 17540.858 | 2.9 |
| 1034.814 | 18 | 18597.505 | $z_{160}$ | 18597.444 | 3.2 |
| 1241.576 | 15 | 18597.509 | $z_{160}$ | 18597.444 | 3.4 |
| 1115.990 | 17 | 18942.680 | $z_{163}$ | 18942.562 | 6.2 |
| 967.999  | 20 | 19327.811 | $z_{167}$ | 19327.758 | 2.7 |
| 1138.645 | 17 | 19327.827 | $z_{167}$ | 19327.758 | 3.6 |
| 1075.444 | 18 | 19327.837 | $z_{167}$ | 19327.758 | 4.1 |
| 1018.895 | 19 | 19327.855 | $z_{167}$ | 19327.758 | 5.0 |
| 1015.024 | 20 | 20268.306 | $z_{175}$ | 20268.244 | 3.0 |



Supplemental Table 2. Peaklist and fragment assignments of one ECD spectrum of mono-phosphorylated  $\alpha$ -Tm isoform (precursor ion at m/z 887, 37+, searched with MASH Suite version 1.0 with no phosphorylation or mono-phosphorylation on *Ser*<sup>283</sup> and validated manually, monophosphorylated ions were labeled as "p" )

| Observed monoisotopic m/z | Charge state | Observed monoisotopic mass (Da) | Fragment assignment | Calculated Monoisotopic mass (Da) | Error (ppm) |
|---------------------------|--------------|---------------------------------|---------------------|-----------------------------------|-------------|
| 618.328                   | 1            | 617.322                         | c <sub>5</sub>      | 617.321                           | 1.7         |
| 746.424                   | 1            | 745.417                         | c <sub>6</sub>      | 745.416                           | 2.3         |
| 503.283                   | 2            | 1004.553                        | c <sub>8</sub>      | 1004.551                          | 1.4         |
| 1005.561                  | 1            | 1004.554                        | c <sub>8</sub>      | 1004.551                          | 3.1         |
| 567.312                   | 2            | 1132.611                        | c <sub>9</sub>      | 1132.610                          | 1.5         |
| 632.832                   | 2            | 1263.651                        | c <sub>10</sub>     | 1263.650                          | 1.0         |
| 689.375                   | 2            | 1376.737                        | c <sub>11</sub>     | 1376.734                          | 2.1         |
| 1377.748                  | 1            | 1376.741                        | c <sub>11</sub>     | 1376.734                          | 4.9         |
| 753.423                   | 2            | 1504.833                        | c <sub>12</sub>     | 1504.829                          | 2.7         |
| 809.965                   | 2            | 1617.917                        | c <sub>13</sub>     | 1617.913                          | 2.6         |
| 578.654                   | 3            | 1732.943                        | c <sub>14</sub>     | 1732.940                          | 1.5         |
| 867.480                   | 2            | 1732.946                        | c <sub>14</sub>     | 1732.940                          | 3.4         |
| 621.687                   | 3            | 1861.039                        | c <sub>15</sub>     | 1861.035                          | 2.0         |
| 932.029                   | 2            | 1861.041                        | c <sub>15</sub>     | 1861.035                          | 2.9         |
| 664.702                   | 3            | 1990.082                        | c <sub>16</sub>     | 1990.078                          | 2.1         |
| 996.552                   | 2            | 1990.087                        | c <sub>16</sub>     | 1990.078                          | 4.8         |
| 702.715                   | 3            | 2104.122                        | c <sub>17</sub>     | 2104.121                          | 0.5         |
| 1053.573                  | 2            | 2104.130                        | c <sub>17</sub>     | 2104.121                          | 4.5         |
| 764.090                   | 3            | 2288.247                        | c <sub>19</sub>     | 2288.242                          | 2.4         |
| 1145.635                  | 2            | 2288.254                        | c <sub>19</sub>     | 2288.242                          | 5.1         |

|          |   |          |          |          |     |
|----------|---|----------|----------|----------|-----|
| 602.076  | 4 | 2403.274 | $c_{20}$ | 2403.269 | 2.2 |
| 802.434  | 3 | 2403.278 | $c_{20}$ | 2403.269 | 3.8 |
| 1203.149 | 2 | 2403.281 | $c_{20}$ | 2403.269 | 5.0 |
| 513.082  | 5 | 2559.373 | $c_{21}$ | 2559.370 | 1.4 |
| 641.101  | 4 | 2559.375 | $c_{21}$ | 2559.370 | 2.0 |
| 854.467  | 3 | 2559.378 | $c_{21}$ | 2559.370 | 3.3 |
| 658.861  | 4 | 2630.414 | $c_{22}$ | 2630.407 | 2.7 |
| 878.147  | 3 | 2630.419 | $c_{22}$ | 2630.407 | 4.4 |
| 691.121  | 4 | 2759.455 | $c_{23}$ | 2759.450 | 2.0 |
| 921.161  | 3 | 2759.459 | $c_{23}$ | 2759.450 | 3.3 |
| 723.137  | 4 | 2887.517 | $c_{24}$ | 2887.508 | 3.0 |
| 963.848  | 3 | 2887.520 | $c_{24}$ | 2887.508 | 4.0 |
| 592.917  | 5 | 2958.549 | $c_{25}$ | 2958.545 | 1.3 |
| 740.895  | 4 | 2958.551 | $c_{25}$ | 2958.545 | 2.1 |
| 987.527  | 3 | 2958.559 | $c_{25}$ | 2958.545 | 4.6 |
| 618.726  | 5 | 3087.593 | $c_{26}$ | 3087.588 | 1.7 |
| 773.156  | 4 | 3087.595 | $c_{26}$ | 3087.588 | 2.3 |
| 1030.542 | 3 | 3087.602 | $c_{26}$ | 3087.588 | 4.5 |
| 632.933  | 5 | 3158.631 | $c_{27}$ | 3158.625 | 1.8 |
| 790.917  | 4 | 3158.637 | $c_{27}$ | 3158.625 | 3.7 |
| 655.939  | 5 | 3273.658 | $c_{28}$ | 3273.652 | 1.9 |
| 819.673  | 4 | 3273.661 | $c_{28}$ | 3273.652 | 2.9 |
| 1092.562 | 3 | 3273.662 | $c_{28}$ | 3273.652 | 3.1 |
| 681.558  | 5 | 3401.754 | $c_{29}$ | 3401.747 | 2.2 |

|         |   |          |          |          |     |
|---------|---|----------|----------|----------|-----|
| 851.948 | 4 | 3401.758 | $c_{29}$ | 3401.747 | 3.1 |
| 707.378 | 5 | 3529.849 | $c_{30}$ | 3529.842 | 2.1 |
| 883.970 | 4 | 3529.848 | $c_{30}$ | 3529.842 | 1.8 |
| 721.585 | 5 | 3600.886 | $c_{31}$ | 3600.879 | 1.8 |
| 901.732 | 4 | 3600.895 | $c_{31}$ | 3600.879 | 4.5 |
| 735.792 | 5 | 3671.921 | $c_{32}$ | 3671.916 | 1.2 |
| 919.490 | 4 | 3671.929 | $c_{32}$ | 3671.916 | 3.5 |
| 761.602 | 5 | 3800.969 | $c_{33}$ | 3800.959 | 2.7 |
| 951.751 | 4 | 3800.972 | $c_{33}$ | 3800.959 | 3.5 |
| 654.006 | 6 | 3915.992 | $c_{34}$ | 3915.986 | 1.7 |
| 784.607 | 5 | 3915.996 | $c_{34}$ | 3915.986 | 2.7 |
| 980.507 | 4 | 3915.997 | $c_{34}$ | 3915.986 | 2.9 |
| 815.827 | 5 | 4072.097 | $c_{35}$ | 4072.087 | 2.6 |
| 715.878 | 6 | 4287.223 | $c_{37}$ | 4287.214 | 2.2 |
| 858.854 | 5 | 4287.229 | $c_{37}$ | 4287.214 | 3.6 |
| 737.221 | 6 | 4415.278 | $c_{38}$ | 4415.272 | 1.4 |
| 648.203 | 7 | 4528.368 | $c_{39}$ | 4528.356 | 2.7 |
| 756.069 | 6 | 4528.369 | $c_{39}$ | 4528.356 | 2.7 |
| 666.637 | 7 | 4657.403 | $c_{40}$ | 4657.399 | 0.9 |
| 777.576 | 6 | 4657.411 | $c_{40}$ | 4657.399 | 2.5 |
| 932.891 | 5 | 4657.414 | $c_{40}$ | 4657.399 | 3.2 |
| 683.070 | 7 | 4772.436 | $c_{41}$ | 4772.426 | 2.0 |
| 796.747 | 6 | 4772.438 | $c_{41}$ | 4772.426 | 2.5 |
| 955.896 | 5 | 4772.441 | $c_{41}$ | 4772.426 | 3.1 |

|          |   |          |                 |          |     |
|----------|---|----------|-----------------|----------|-----|
| 818.422  | 6 | 4901.481 | c <sub>42</sub> | 4901.468 | 2.7 |
| 981.906  | 5 | 4901.488 | c <sub>42</sub> | 4901.468 | 3.9 |
| 853.780  | 6 | 5113.634 | c <sub>44</sub> | 5113.621 | 2.5 |
| 744.389  | 7 | 5200.666 | c <sub>45</sub> | 5200.653 | 2.6 |
| 868.286  | 6 | 5200.669 | c <sub>45</sub> | 5200.653 | 3.1 |
| 778.837  | 7 | 5441.805 | c <sub>47</sub> | 5441.796 | 1.8 |
| 908.476  | 6 | 5441.810 | c <sub>47</sub> | 5441.796 | 2.7 |
| 1089.971 | 5 | 5441.811 | c <sub>47</sub> | 5441.796 | 2.8 |
| 797.137  | 7 | 5569.905 | c <sub>48</sub> | 5569.891 | 2.6 |
| 929.828  | 6 | 5569.919 | c <sub>48</sub> | 5569.891 | 5.1 |
| 1115.594 | 5 | 5569.929 | c <sub>48</sub> | 5569.891 | 7.0 |
| 713.632  | 8 | 5697.992 | c <sub>49</sub> | 5697.986 | 1.1 |
| 815.437  | 7 | 5698.002 | c <sub>49</sub> | 5697.986 | 2.8 |
| 849.891  | 7 | 5939.181 | c <sub>51</sub> | 5939.165 | 2.8 |
| 765.291  | 8 | 6111.266 | c <sub>53</sub> | 6111.249 | 2.7 |
| 874.475  | 7 | 6111.271 | c <sub>53</sub> | 6111.249 | 3.5 |
| 781.421  | 8 | 6240.303 | c <sub>54</sub> | 6240.292 | 1.8 |
| 707.489  | 9 | 6355.337 | c <sub>55</sub> | 6355.319 | 2.8 |
| 795.800  | 8 | 6355.336 | c <sub>55</sub> | 6355.319 | 2.7 |
| 909.343  | 7 | 6355.343 | c <sub>55</sub> | 6355.319 | 3.8 |
| 811.930  | 8 | 6484.379 | c <sub>56</sub> | 6484.361 | 2.7 |
| 734.503  | 9 | 6597.458 | c <sub>57</sub> | 6597.446 | 1.8 |
| 826.191  | 8 | 6597.466 | c <sub>57</sub> | 6597.446 | 3.1 |
| 944.076  | 7 | 6597.471 | c <sub>57</sub> | 6597.446 | 3.9 |

|          |    |           |                   |           |     |
|----------|----|-----------|-------------------|-----------|-----|
| 710.475  | 10 | 7090.674  | $c_{61}$          | 7090.663  | 1.6 |
| 789.305  | 9  | 7090.678  | $c_{61}$          | 7090.663  | 2.2 |
| 1014.535 | 7  | 7090.690  | $c_{61}$          | 7090.663  | 3.8 |
| 803.645  | 9  | 7219.730  | $c_{62}$          | 7219.705  | 3.4 |
| 903.974  | 8  | 7219.725  | $c_{62}$          | 7219.705  | 2.7 |
| 811.537  | 9  | 7290.764  | $c_{63}$          | 7290.742  | 2.9 |
| 824.103  | 9  | 7403.853  | $c_{64}$          | 7403.827  | 3.6 |
| 838.335  | 9  | 7531.945  | $c_{65}$          | 7531.921  | 3.1 |
| 859.008  | 9  | 7718.005  | $c_{67}$          | 7717.986  | 2.5 |
| 786.015  | 10 | 7846.075  | $c_{68}$          | 7846.044  | 3.9 |
| 873.237  | 9  | 7846.064  | $c_{68}$          | 7846.044  | 2.5 |
| 847.350  | 10 | 8458.416  | $c_{73}$          | 8458.392  | 2.8 |
| 854.453  | 10 | 8529.449  | $c_{74}$          | 8529.429  | 2.3 |
| 827.533  | 11 | 9086.773  | $c_{79}$          | 9086.747  | 2.9 |
| 862.637  | 11 | 9472.915  | $c_{83}$          | 9472.891  | 2.6 |
| 917.209  | 11 | 10072.205 | $c_{89}$          | 10072.182 | 2.2 |
| 775.558  | 14 | 10837.702 | $c_{95}$          | 10837.679 | 2.1 |
| 1422.586 | 1  | 1421.580  | $p\check{z}_{12}$ | 1421.566  | 9.5 |
| 895.107  | 3  | 2681.297  | $p\check{z}_{23}$ | 2681.290  | 2.6 |
| 949.462  | 3  | 2844.364  | $p\check{z}_{24}$ | 2844.353  | 3.7 |
| 1068.515 | 3  | 3201.522  | $p\check{z}_{27}$ | 3201.507  | 4.7 |
| 1187.902 | 3  | 3558.682  | $p\check{z}_{30}$ | 3558.660  | 6.0 |
| 1226.244 | 3  | 3673.705  | $p\check{z}_{31}$ | 3673.687  | 4.9 |
| 1335.649 | 3  | 4001.921  | $p\check{z}_{34}$ | 4001.898  | 5.7 |

|          |   |          |                  |          |     |
|----------|---|----------|------------------|----------|-----|
| 1378.666 | 3 | 4130.971 | pž <sub>35</sub> | 4130.941 | 7.3 |
| 1416.360 | 3 | 4244.055 | pž <sub>36</sub> | 4244.025 | 7.1 |
| 1459.059 | 3 | 4372.152 | pž <sub>37</sub> | 4372.120 | 7.4 |
| 964.483  | 5 | 4815.376 | pž <sub>41</sub> | 4815.369 | 1.5 |
| 1205.356 | 4 | 4815.390 | pž <sub>41</sub> | 4815.369 | 4.3 |
| 1255.626 | 4 | 5015.471 | pž <sub>43</sub> | 5015.449 | 4.4 |
| 1292.395 | 4 | 5162.544 | pž <sub>44</sub> | 5162.517 | 5.2 |
| 1324.657 | 4 | 5291.591 | pž <sub>45</sub> | 5291.560 | 6.0 |
| 1105.353 | 5 | 5518.725 | pž <sub>47</sub> | 5518.698 | 4.9 |
| 1381.441 | 4 | 5518.729 | pž <sub>47</sub> | 5518.698 | 5.6 |
| 1125.562 | 5 | 5619.766 | pž <sub>48</sub> | 5619.746 | 3.6 |
| 1165.579 | 5 | 5819.856 | pž <sub>50</sub> | 5819.825 | 5.2 |
| 992.991  | 6 | 5948.900 | pž <sub>51</sub> | 5948.868 | 5.4 |
| 1191.387 | 5 | 5948.893 | pž <sub>51</sub> | 5948.868 | 4.3 |
| 1073.708 | 6 | 6433.199 | pž <sub>55</sub> | 6433.169 | 4.7 |
| 1288.249 | 5 | 6433.203 | pž <sub>55</sub> | 6433.169 | 5.4 |
| 1145.087 | 6 | 6860.471 | pž <sub>59</sub> | 6860.448 | 3.3 |
| 1034.671 | 7 | 7231.640 | pž <sub>62</sub> | 7231.618 | 3.1 |
| 1111.134 | 7 | 7766.878 | pž <sub>66</sub> | 7766.845 | 4.1 |
| 1004.636 | 8 | 8024.021 | pž <sub>68</sub> | 8023.983 | 4.8 |
| 1148.011 | 7 | 8024.020 | pž <sub>68</sub> | 8023.983 | 4.6 |
| 1339.178 | 6 | 8024.017 | pž <sub>68</sub> | 8023.983 | 4.2 |
| 1020.644 | 8 | 8152.082 | pž <sub>69</sub> | 8152.041 | 5.0 |
| 1166.307 | 7 | 8152.087 | pž <sub>69</sub> | 8152.041 | 5.6 |

|          |    |           |                    |           |     |
|----------|----|-----------|--------------------|-----------|-----|
| 1360.525 | 6  | 8152.097  | p <sub>z</sub> 69  | 8152.041  | 6.8 |
| 1084.047 | 8  | 8659.312  | p <sub>z</sub> 73  | 8659.274  | 4.3 |
| 1133.944 | 8  | 9058.482  | p <sub>z</sub> 77  | 9058.450  | 3.5 |
| 1057.206 | 9  | 9499.778  | p <sub>z</sub> 81  | 9499.745  | 3.4 |
| 1189.227 | 8  | 9499.746  | p <sub>z</sub> 81  | 9499.745  | 0.1 |
| 1041.532 | 10 | 10399.238 | p <sub>z</sub> 89  | 10399.216 | 2.1 |
| 1007.676 | 12 | 12073.011 | p <sub>z</sub> 104 | 12072.973 | 3.2 |
| 974.968  | 15 | 14600.397 | p <sub>z</sub> 125 | 14600.349 | 3.3 |

Supplemental Table 3. Peak list and fragment assignment of one ECD spectrum of un-phosphorylated  $\beta$ -Tm isoform (precursor ion at  $m/z$  889, 37+, searched with MASH Suite version 1.0 and manually validated)

| Observed monoisotopic $m/z$ | Charge state | Observed monoisotopic mass (Da) | Fragment assignment | Calculated Monoisotopic mass (Da) | Error (ppm) |
|-----------------------------|--------------|---------------------------------|---------------------|-----------------------------------|-------------|
| 618.327                     | 1            | 617.321                         | $c_5$               | 617.321                           | 0.2         |
| 746.423                     | 1            | 745.416                         | $c_6$               | 745.416                           | 0.2         |
| 503.282                     | 2            | 1004.551                        | $c_8$               | 1004.551                          | 0.0         |
| 567.312                     | 2            | 1132.610                        | $c_9$               | 1132.610                          | 0.1         |
| 632.832                     | 2            | 1263.651                        | $c_{10}$            | 1263.650                          | 0.7         |
| 1377.744                    | 1            | 1376.737                        | $c_{11}$            | 1376.734                          | 2.1         |
| 689.374                     | 2            | 1376.734                        | $c_{11}$            | 1376.734                          | 0.1         |
| 753.421                     | 2            | 1504.829                        | $c_{12}$            | 1504.829                          | 0.1         |
| 809.963                     | 2            | 1617.913                        | $c_{13}$            | 1617.913                          | 0.1         |
| 540.311                     | 3            | 1617.913                        | $c_{13}$            | 1617.913                          | -0.3        |
| 867.477                     | 2            | 1732.941                        | $c_{14}$            | 1732.940                          | 0.3         |
| 578.654                     | 3            | 1732.941                        | $c_{14}$            | 1732.940                          | 0.4         |
| 932.026                     | 2            | 1861.036                        | $c_{15}$            | 1861.035                          | 0.6         |
| 621.682                     | 3            | 1861.022                        | $c_{15}$            | 1861.035                          | -7.0        |
| 621.686                     | 3            | 1861.036                        | $c_{15}$            | 1861.035                          | 0.4         |
| 466.265                     | 4            | 1861.034                        | $c_{15}$            | 1861.035                          | -0.6        |
| 996.546                     | 2            | 1990.076                        | $c_{16}$            | 1990.078                          | -0.7        |
| 664.701                     | 3            | 1990.079                        | $c_{16}$            | 1990.078                          | 0.5         |
| 1053.570                    | 2            | 2104.125                        | $c_{17}$            | 2104.121                          | 1.8         |
| 702.715                     | 3            | 2104.122                        | $c_{17}$            | 2104.121                          | 0.6         |



|          |   |          |          |          |      |
|----------|---|----------|----------|----------|------|
| 764.088  | 3 | 2288.242 | $c_{19}$ | 2288.242 | 0.0  |
| 1203.142 | 2 | 2403.267 | $c_{20}$ | 2403.269 | -0.8 |
| 802.431  | 3 | 2403.271 | $c_{20}$ | 2403.269 | 0.8  |
| 602.075  | 4 | 2403.270 | $c_{20}$ | 2403.269 | 0.3  |
| 641.100  | 4 | 2559.371 | $c_{21}$ | 2559.370 | 0.3  |
| 513.082  | 5 | 2559.372 | $c_{21}$ | 2559.370 | 0.7  |
| 658.859  | 4 | 2630.407 | $c_{22}$ | 2630.407 | -0.2 |
| 691.120  | 4 | 2759.451 | $c_{23}$ | 2759.450 | 0.4  |
| 553.096  | 5 | 2759.446 | $c_{23}$ | 2759.450 | -1.4 |
| 963.845  | 3 | 2887.511 | $c_{24}$ | 2887.508 | 0.8  |
| 723.134  | 4 | 2887.505 | $c_{24}$ | 2887.508 | -1.2 |
| 987.525  | 3 | 2958.551 | $c_{25}$ | 2958.545 | 2.1  |
| 740.894  | 4 | 2958.544 | $c_{25}$ | 2958.545 | -0.4 |
| 592.916  | 5 | 2958.546 | $c_{25}$ | 2958.545 | 0.1  |
| 1030.539 | 3 | 3087.592 | $c_{26}$ | 3087.588 | 1.5  |
| 773.154  | 4 | 3087.587 | $c_{26}$ | 3087.588 | -0.2 |
| 618.725  | 5 | 3087.589 | $c_{26}$ | 3087.588 | 0.5  |
| 632.932  | 5 | 3158.625 | $c_{27}$ | 3158.625 | 0.1  |
| 1092.558 | 3 | 3273.651 | $c_{28}$ | 3273.652 | -0.3 |
| 819.671  | 4 | 3273.654 | $c_{28}$ | 3273.652 | 0.6  |
| 655.938  | 5 | 3273.653 | $c_{28}$ | 3273.652 | 0.2  |
| 851.946  | 4 | 3401.750 | $c_{29}$ | 3401.747 | 0.8  |
| 681.557  | 5 | 3401.750 | $c_{29}$ | 3401.747 | 0.8  |
| 883.970  | 4 | 3529.846 | $c_{30}$ | 3529.842 | 1.1  |

|          |   |          |          |          |      |
|----------|---|----------|----------|----------|------|
| 707.377  | 5 | 3529.844 | $c_{30}$ | 3529.842 | 0.6  |
| 732.987  | 5 | 3657.893 | $c_{31}$ | 3657.900 | -1.9 |
| 966.003  | 4 | 3857.980 | $c_{33}$ | 3857.980 | -0.1 |
| 773.005  | 5 | 3857.984 | $c_{33}$ | 3857.980 | 1.0  |
| 644.338  | 6 | 3857.984 | $c_{33}$ | 3857.980 | 1.0  |
| 1123.578 | 4 | 4488.279 | $c_{38}$ | 4488.271 | 1.7  |
| 658.630  | 7 | 4601.358 | $c_{39}$ | 4601.355 | 0.7  |
| 854.264  | 6 | 5116.535 | $c_{43}$ | 5116.541 | -1.2 |
| 1050.529 | 5 | 5244.605 | $c_{44}$ | 5244.600 | 0.9  |
| 875.608  | 6 | 5244.601 | $c_{44}$ | 5244.600 | 0.3  |
| 750.665  | 7 | 5244.602 | $c_{44}$ | 5244.600 | 0.5  |
| 760.814  | 7 | 5315.640 | $c_{45}$ | 5315.637 | 0.7  |
| 906.295  | 6 | 5428.724 | $c_{46}$ | 5428.721 | 0.6  |
| 776.969  | 7 | 5428.725 | $c_{46}$ | 5428.721 | 0.7  |
| 758.152  | 8 | 6054.150 | $c_{51}$ | 6054.149 | 0.2  |
| 777.910  | 8 | 6212.219 | $c_{53}$ | 6212.218 | 0.2  |
| 907.330  | 7 | 6341.256 | $c_{54}$ | 6341.260 | -0.7 |
| 794.040  | 8 | 6341.259 | $c_{54}$ | 6341.260 | -0.3 |
| 923.763  | 7 | 6456.288 | $c_{55}$ | 6456.287 | 0.1  |
| 808.420  | 8 | 6456.294 | $c_{55}$ | 6456.287 | 1.0  |
| 718.706  | 9 | 6456.289 | $c_{55}$ | 6456.287 | 0.3  |
| 956.494  | 7 | 6684.400 | $c_{57}$ | 6684.398 | 0.3  |
| 837.058  | 8 | 6684.402 | $c_{57}$ | 6684.398 | 0.5  |
| 744.163  | 9 | 6684.398 | $c_{57}$ | 6684.398 | -0.1 |

|          |    |           |          |           |      |
|----------|----|-----------|----------|-----------|------|
| 1338.695 | 5  | 6684.433  | $c_{57}$ | 6684.398  | 5.1  |
| 1115.746 | 6  | 6684.424  | $c_{57}$ | 6684.398  | 3.8  |
| 853.186  | 8  | 6813.424  | $c_{58}$ | 6813.441  | -2.5 |
| 900.462  | 8  | 7191.631  | $c_{61}$ | 7191.631  | -0.1 |
| 800.522  | 9  | 7191.631  | $c_{61}$ | 7191.631  | 0.0  |
| 720.570  | 10 | 7191.617  | $c_{61}$ | 7191.631  | -1.9 |
| 814.860  | 9  | 7320.671  | $c_{62}$ | 7320.674  | -0.3 |
| 835.538  | 9  | 7506.770  | $c_{64}$ | 7506.774  | -0.5 |
| 752.087  | 10 | 7506.797  | $c_{64}$ | 7506.774  | 3.0  |
| 849.771  | 9  | 7634.872  | $c_{65}$ | 7634.869  | 0.3  |
| 796.308  | 10 | 7949.006  | $c_{68}$ | 7948.992  | 1.8  |
| 809.312  | 10 | 8078.035  | $c_{69}$ | 8078.034  | 0.0  |
| 940.259  | 9  | 8448.258  | $c_{72}$ | 8448.256  | 0.2  |
| 787.585  | 11 | 8647.344  | $c_{74}$ | 8647.352  | -0.9 |
| 879.147  | 10 | 8776.392  | $c_{75}$ | 8776.394  | -0.2 |
| 855.166  | 11 | 9390.735  | $c_{81}$ | 9390.733  | 0.2  |
| 827.889  | 13 | 10743.459 | $c_{93}$ | 10743.449 | 0.9  |
| 1061.548 | 2  | 2120.079  | $z_{19}$ | 2120.076  | 1.4  |
| 1127.067 | 2  | 2251.118  | $z_{20}$ | 2251.117  | 0.6  |
| 1191.112 | 2  | 2379.208  | $z_{21}$ | 2379.212  | -1.5 |
| 860.778  | 3  | 2578.310  | $z_{23}$ | 2578.307  | 0.9  |
| 1421.728 | 2  | 2840.439  | $z_{25}$ | 2840.439  | 0.1  |
| 948.154  | 3  | 2840.440  | $z_{25}$ | 2840.439  | 0.3  |
| 1486.253 | 2  | 2969.489  | $z_{26}$ | 2969.482  | 2.4  |

|          |   |          |          |          |      |
|----------|---|----------|----------|----------|------|
| 991.169  | 3 | 2969.483 | $z_{26}$ | 2969.482 | 0.3  |
| 1029.512 | 3 | 3084.512 | $z_{27}$ | 3084.509 | 0.9  |
| 1148.898 | 3 | 3441.669 | $z_{30}$ | 3441.662 | 1.9  |
| 1187.238 | 3 | 3556.688 | $z_{31}$ | 3556.689 | -0.3 |
| 1301.315 | 3 | 3898.919 | $z_{34}$ | 3898.916 | 0.8  |
| 1344.329 | 3 | 4027.961 | $z_{35}$ | 4027.959 | 0.5  |
| 1382.025 | 3 | 4141.050 | $z_{36}$ | 4141.043 | 1.8  |
| 1424.724 | 3 | 4269.145 | $z_{37}$ | 4269.138 | 1.8  |
| 1448.401 | 3 | 4340.177 | $z_{38}$ | 4340.175 | 0.4  |
| 1510.436 | 3 | 4526.282 | $z_{40}$ | 4526.275 | 1.6  |
| 1172.104 | 4 | 4682.384 | $z_{41}$ | 4682.376 | 1.6  |
| 1204.364 | 4 | 4811.426 | $z_{42}$ | 4811.419 | 1.4  |
| 963.692  | 5 | 4811.421 | $z_{42}$ | 4811.419 | 0.4  |
| 1629.498 | 3 | 4882.465 | $z_{43}$ | 4882.456 | 1.9  |
| 1222.374 | 4 | 4882.461 | $z_{43}$ | 4882.456 | 1.0  |
| 1678.522 | 3 | 5029.539 | $z_{44}$ | 5029.524 | 2.9  |
| 1259.142 | 4 | 5029.532 | $z_{44}$ | 5029.524 | 1.6  |
| 1291.400 | 4 | 5158.566 | $z_{45}$ | 5158.567 | -0.3 |
| 1348.189 | 4 | 5385.722 | $z_{47}$ | 5385.705 | 3.1  |
| 1078.751 | 5 | 5385.714 | $z_{47}$ | 5385.705 | 1.6  |
| 1373.452 | 4 | 5486.772 | $z_{48}$ | 5486.753 | 3.4  |
| 1098.961 | 5 | 5486.763 | $z_{48}$ | 5486.753 | 1.8  |
| 1124.765 | 5 | 5615.786 | $z_{49}$ | 5615.795 | -1.7 |
| 813.847  | 7 | 5686.877 | $z_{50}$ | 5686.832 | 7.8  |

|          |    |           |          |           |      |
|----------|----|-----------|----------|-----------|------|
| 1455.729 | 4  | 5815.881  | $z_{51}$ | 5815.875  | 1.1  |
| 1164.785 | 5  | 5815.884  | $z_{51}$ | 5815.875  | 1.5  |
| 1075.382 | 6  | 6443.241  | $z_{56}$ | 6443.234  | 1.1  |
| 1335.690 | 5  | 6669.408  | $z_{58}$ | 6669.402  | 0.8  |
| 1113.238 | 6  | 6669.377  | $z_{58}$ | 6669.402  | -3.8 |
| 988.807  | 7  | 6910.592  | $z_{60}$ | 6910.581  | 1.5  |
| 1007.241 | 7  | 7039.627  | $z_{61}$ | 7039.624  | 0.5  |
| 1196.454 | 6  | 7168.675  | $z_{62}$ | 7168.667  | 1.1  |
| 1025.677 | 7  | 7168.679  | $z_{62}$ | 7168.667  | 1.7  |
| 1217.956 | 6  | 7297.686  | $z_{63}$ | 7297.709  | -3.1 |
| 1044.113 | 7  | 7297.730  | $z_{63}$ | 7297.709  | 2.9  |
| 1285.660 | 6  | 7703.909  | $z_{66}$ | 7703.894  | 1.9  |
| 1102.138 | 7  | 7703.906  | $z_{66}$ | 7703.894  | 1.5  |
| 1307.164 | 6  | 7832.933  | $z_{67}$ | 7832.937  | -0.5 |
| 1120.568 | 7  | 7832.918  | $z_{67}$ | 7832.937  | -2.5 |
| 1328.517 | 6  | 7961.052  | $z_{68}$ | 7961.032  | 2.6  |
| 1138.871 | 7  | 7961.040  | $z_{68}$ | 7961.032  | 1.1  |
| 996.638  | 8  | 7961.043  | $z_{68}$ | 7961.032  | 1.3  |
| 1207.477 | 7  | 8440.276  | $z_{72}$ | 8440.270  | 0.7  |
| 1032.336 | 10 | 10307.275 | $z_{89}$ | 10307.275 | 0.0  |

## Supplemental Figures

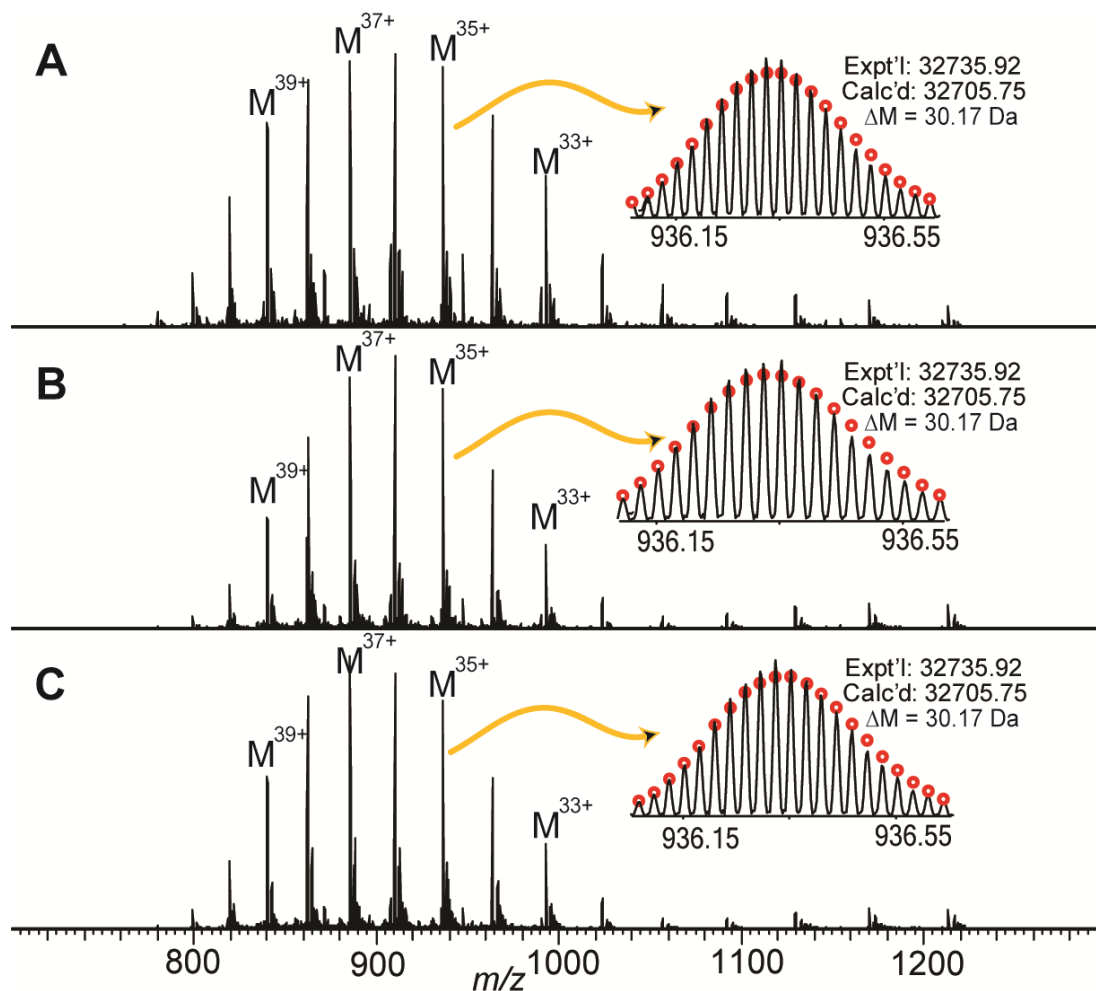

**Supplemental Figure 1. Broadband ESI/FTMS spectra of swine Tm purified from three different domestic swine hearts (A), (B) and (C).** Isotopically resolved molecular ions of the predominant swine Tm from three swine hearts were demonstrated in the spectra with highly accurate molecular weights measured. Circles: the theoretical isotopic distribution of isotopomer peaks. Calc'd, calculated most abundant molecular weight. Expt'l, experimental most abundant molecular weight. Molecular weights were calculated based on DNA-predicted sequence of *Sus scrofa* Tm (UnitprotKB/Swiss-Prot P42639, TPM1\_PIG) without modification.

```

SP|P42639|TPM1_PIG ----- MDAIKKKMQLKLDKENALDRAEQAEADKKAAEDRSKRLEDELVSLQKKLKATE 54
TR|A1X899|A1X899_PIG ----- MDAIKKKMQLKLDKENAIDRAEQAEADKKQAE DRCKQLEEEQQALQKKLKGTE 54
SP|A1XQV4|TPM3_PIG ----- MEAIKKKMQLKLDKENALDRAEQAEAEQKQAEERSKQLEDELAAMQKKLKGTE 54
SP|P67937|TPM4_PIG  MAGLNSLEAVKRRIQALQQ ----- 19
                        :::*:*:* * *:

SP|P42639|TPM1_PIG  DELDKYSEAPKDAQEKLELAEKKATDAEADVASLNRRRIQLVEEELDRAQERLATALQKLE 114
TR|A1X899|A1X899_PIG DEVEKYSESVKDAQEKLEQAEKKATDAEADVASLNRRRIQLVEEELDRAQERLATALQKLE 114
SP|A1XQV4|TPM3_PIG  DELDKYSEALKDAQEKLELAEKKAADAEAEVASLNRRRIQLVEEELDRAQERLATALQKLE 114
SP|P67937|TPM4_PIG  -QADEAEDRAQGLQRELDGERERREKAEGDVAALNRRRIQLVEEELDRAQERLATALQKLE 78
                        : :: .: : *::: .: : .**::*:*****

SP|P42639|TPM1_PIG  EAEKAADESERGMKVIESRAQKDEEKMEIQ---EIQLKEAKHIAEDADRKYEEVARKLVI 171
TR|A1X899|A1X899_PIG EAEKAADESERGLKVIENRAMKDEEKMELOEMQEMQLKEAKHIAESDRKYEEVARKLVI 174
SP|A1XQV4|TPM3_PIG  EAEKAADESERGMKVIEENRALKDEEKMELO---EIQLKEAKHIAEEADRKYEEVARKLVI 171
SP|P67937|TPM4_PIG  EAEKAADESERGMKVIEENRAMKDEEKMEIQ---EMQLKEAKHIAEEADRKYEEVARKLVI 135
                        *****:****.* *****:* *:*****:*****

SP|P42639|TPM1_PIG  IESDLERAEEERAELSEGKCAELEELKTVTNNLKSLEAQAEKYSQKEDKYEEEEIKVLSDK 231
TR|A1X899|A1X899_PIG LEGELERSEERA EVAESRARQLEELRTMDQALKSLMASEEYSTKEDKYEEEEIKLLEEK 234
SP|A1XQV4|TPM3_PIG  IEGDLERTEERAELAEFKCFELEELKNVTNNLKFLEAQAEKYFQKDKYEEEEIKILTDK 231
SP|P67937|TPM4_PIG  LEGELERAEEERA EVSELKCGDLEELKNVTNNLKSLEAASEKYSEKEDKYEEEEIKLLSDK 195
                        :*.:***:*****:* .: .:*****:.: : ** * * *: * *:*****:* :*

SP|P42639|TPM1_PIG  LKEAETRAEFAERSVTKLEKSIDDLEDELYAQKLYKAISEELDHALNDMTSI 284
TR|A1X899|A1X899_PIG LKEAETRAEFAERSVAKLEKTIDDLEETLASAKEENVEIHQTLDTLLELNNL 287
SP|A1XQV4|TPM3_PIG  LKEAETRAEFAERSVAKLEKTIDDLEDELYAQKLYKAISEELDHALNDMTSI 284
SP|P67937|TPM4_PIG  LKEAETRAEFAERTVAKLEKTIDDLEEKLAQAKEENVGLHQTLDTLNEINCI 248
                        *****:*:****:*****: * * : : **: * :.: :

TR|A1X899|A1X899_PIG: TPM2

```

**Supplemental Figure 2. Protein sequence homology alignment of multiple swine Tm isoforms.** The swine isoforms presented here are encoded by *TPM1*, *TPM2*, *TPM3* and *TPM4* genes, respectively (UniprotKB/Swiss-Prot database). Asterisks indicate the conserved sequence regions. A1X899\_PIG is encoded by *TPM2* gene but the sequence is marked as “unreviewed” in the SwissProt database.

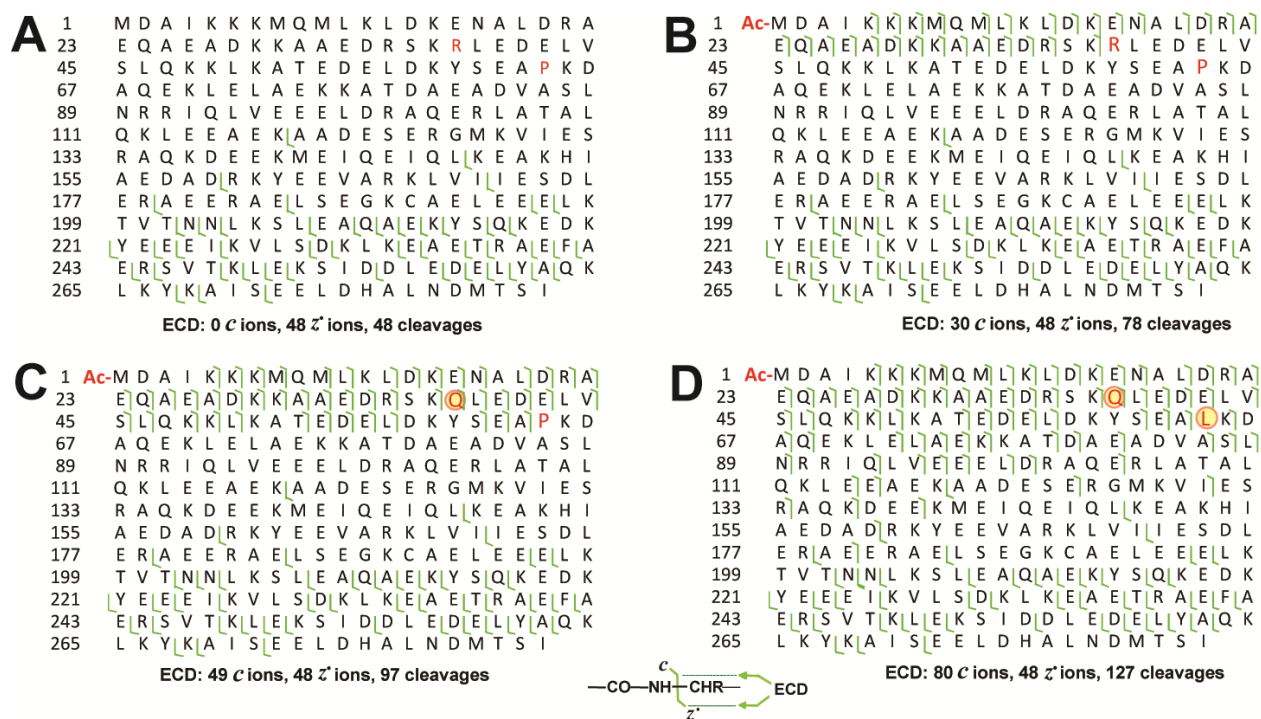

**Supplemental Figure 3. MS/MS product ion map from one ECD spectrum of predominant swine Tm for assignment to un-phosphorylated swine  $\alpha$ -Tm.** (A) Fragment assignments were made to the DNA-predicted sequence of *Sus scrofa* (UnitprotKB/Swiss-Prot P42639, TPM1\_PIG) without any modifications. (B) Fragment assignments were made to the *Sus scrofa* Tm sequence with acetylation of the first N-terminal amino acid. (C) Fragment assignments were made to the *Sus scrofa* Tm sequence with acetylation and one amino acid polymorphism R38→Q. (D) Fragment assignments were made to the *Sus scrofa* Tm sequence with acetylation and two amino acid polymorphisms R38→Q and P64→L. Two amino acid polymorphisms were highlighted by orange circles.



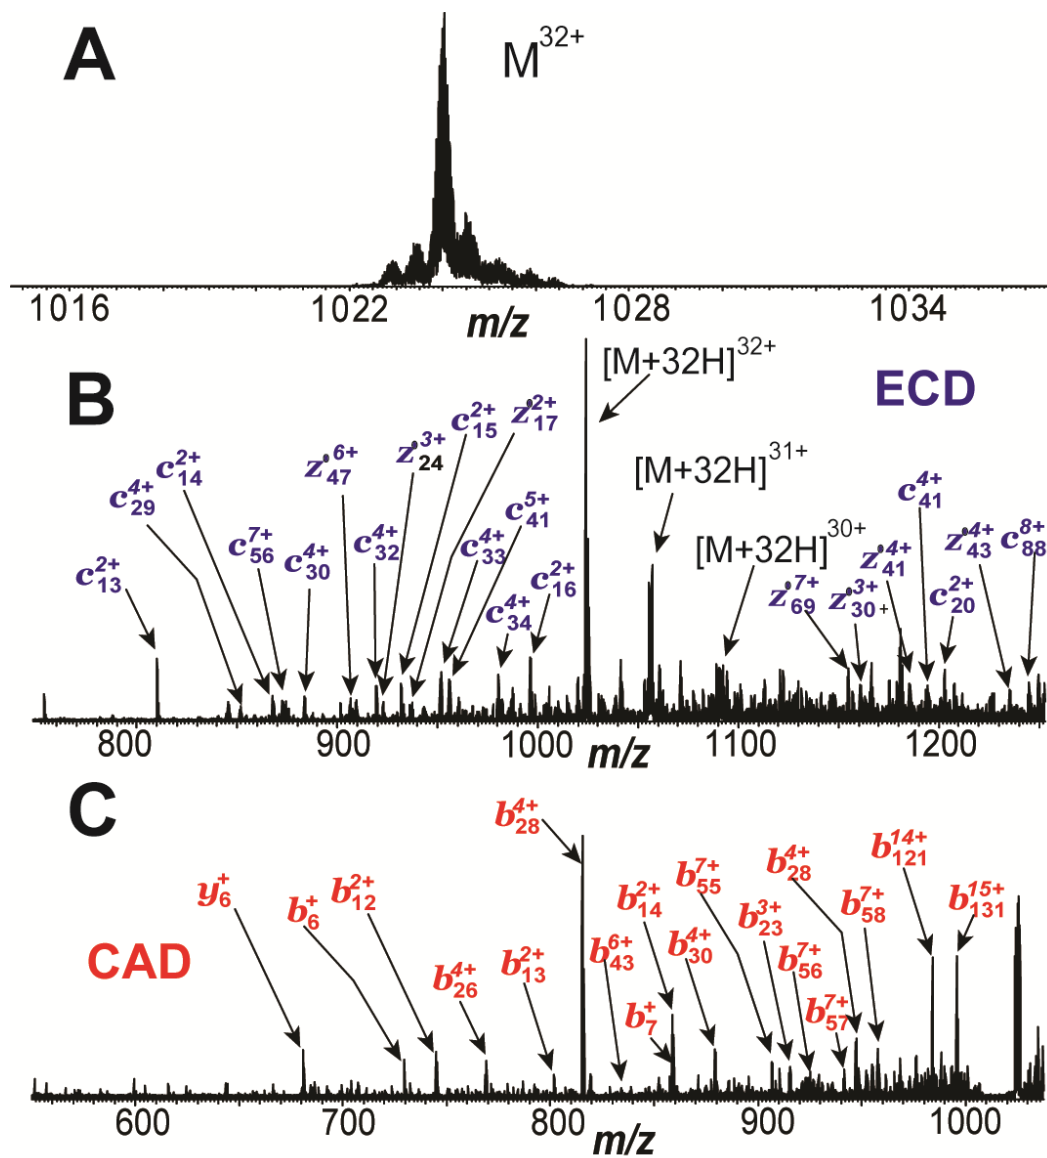

**Supplemental Figure 4. (A) Isolation of single charge state ( $M^{32+}$ ) of  $\alpha$ -Tm precursor ions, (B) ECD and (C) CAD spectra of the isolated  $\alpha$ -Tm ions. The product ions in (B) and (C) were assigned according to the sequence of swine  $\alpha$ -Tm (UnitprotKB/Swiss-Prot P42639, TPM1\_PIG) with acetylation of the first amino acid at the N-terminus and two amino acid polymorphisms.**

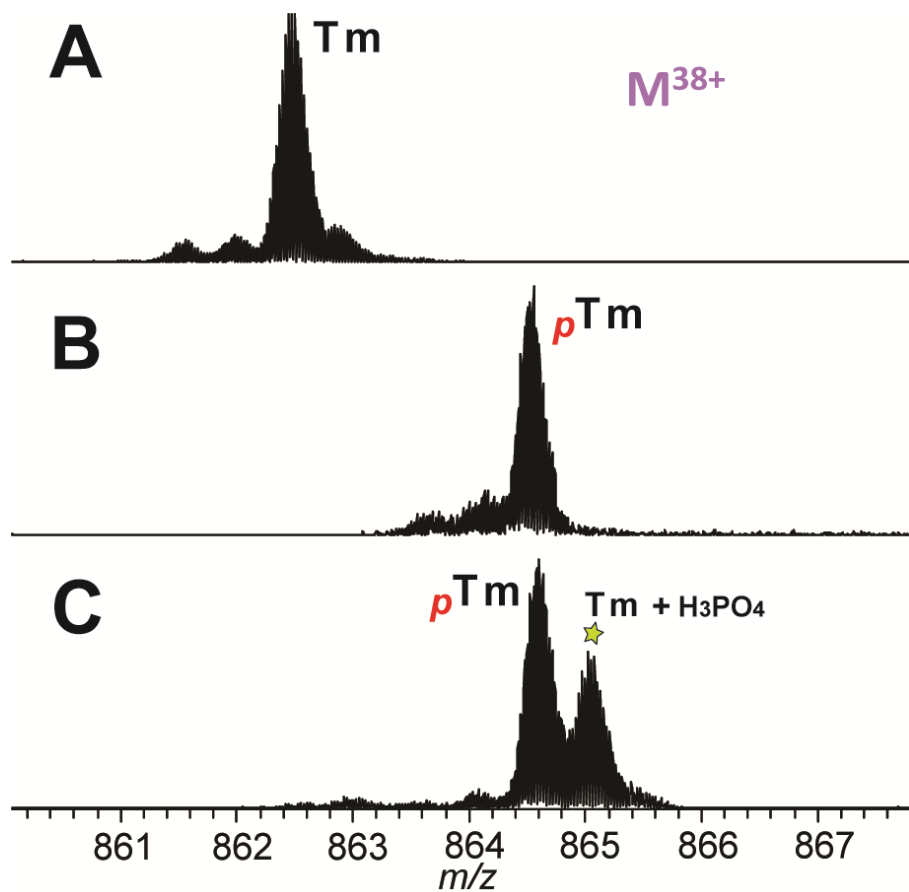

**Supplemental Figure 5. Gas-phase separation (purification) of swine Tm.** Isolation of a single charge state ( $M^{38+}$ ) of (A) un-phosphorylated swine  $\alpha$ -Tm, (B) mono-phosphorylated swine  $\alpha$ -Tm, and (C) mixture of un-phosphorylated (phosphoric acid adduct) and mono-phosphorylated swine Tm.  $p$ Tm, mono-phosphorylated pig  $\alpha$ -Tm.  $H_3PO_4$ , non-covalent adduct of phosphoric acid.

CLUSTAL O(1.1.0) multiple sequence alignment

```

SP|sp|P42639|TPM1_PIG|MDAIAKKKMQMLKLDKENALDRAEQAEADKKAEDRSKRLEDELVSLQKKLKATEDELDDKY 60
SP|sp|P09493|TPM1_HUMAN|MDAIAKKKMQMLKLDKENALDRAEQAEADKKAEDRSKQLEDELVSLQKKLKGTEDELDDKY 60
SP|sp|P58771|TPM1_MOUSE|MDAIAKKKMQMLKLDKENALDRAEQAEADKKAEDRSKQLEDELVSLQKKLKGTEDELDDKY 60
SP|sp|P58772|TPM1_RABIT|MDAIAKKKMQMLKLDKENALDRAEQAEADKKAEDRSKQLEDELVSLQKKLKGTEDELDDKY 60
SP|sp|P04692|TPM1_RAT|MDAIAKKKMQMLKLDKENALDRAEQAEADKKAEDRSKQLEDELVSLQKKLKGTEDELDDKY 60
SP|sp|Q5KR49|TPM1_BOVIN|MDAIAKKKMQMLKLDKENALDRAEQAEADKKAEDRSKQLEDELVSLQKKLKATEDELDDKY 60
*****

SP|sp|P42639|TPM1_PIG|SEAPKDAQEKLELAEKKATDAEADVASLNRRIQLVVEEELDRAQERLATALQKLEEAEKAA 120
SP|sp|P09493|TPM1_HUMAN|SEALKDAQEKLELAEKKATDAEADVASLNRRIQLVVEEELDRAQERLATALQKLEEAEKAA 120
SP|sp|P58771|TPM1_MOUSE|SEALKDAQEKLELAEKKATDAEADVASLNRRIQLVVEEELDRAQERLATALQKLEEAEKAA 120
SP|sp|P58772|TPM1_RABIT|SEALKDAQEKLELAEKKATDAEADVASLNRRIQLVVEEELDRAQERLATALQKLEEAEKAA 120
SP|sp|P04692|TPM1_RAT|SEALKDAQEKLELAEKKATDAEADVASLNRRIQLVVEEELDRAQERLATALQKLEEAEKAA 120
SP|sp|Q5KR49|TPM1_BOVIN|SEALKDAQEKLELAEKKATDAEADVASLNRRIQLVVEEELDRAQERLATALQKLEEAEKAA 120
***

SP|sp|P42639|TPM1_PIG|DESERGMKVIESRAQKDEEKMEIQEIQLKEAKHIAEDADRKYEEVARKLVIIESDLERA 180
SP|sp|P09493|TPM1_HUMAN|DESERGMKVIESRAQKDEEKMEIQEIQLKEAKHIAEDADRKYEEVARKLVIIESDLERA 180
SP|sp|P58771|TPM1_MOUSE|DESERGMKVIESRAQKDEEKMEIQEIQLKEAKHIAEDADRKYEEVARKLVIIESDLERA 180
SP|sp|P58772|TPM1_RABIT|DESERGMKVIESRAQKDEEKMEIQEIQLKEAKHIAEDADRKYEEVARKLVIIESDLERA 180
SP|sp|P04692|TPM1_RAT|DESERGMKVIESRAQKDEEKMEIQEIQLKEAKHIAEDADRKYEEVARKLVIIESDLERA 180
SP|sp|Q5KR49|TPM1_BOVIN|DESERGMKVIESRAQKDEEKMEIQEIQLKEAKHIAEDADRKYEEVARKLVIIESDLERA 180
*****

SP|sp|P42639|TPM1_PIG|ERAELSEGKCAELEELKTVTNNLKSLEAQAEKYSQKEDKYEIEIKVLSDKLKEAETRAE 240
SP|sp|P09493|TPM1_HUMAN|ERAELSEGKCAELEELKTVTNNLKSLEAQAEKYSQKEDRYEIEIKVLSDKLKEAETRAE 240
SP|sp|P58771|TPM1_MOUSE|ERAELSEGKCAELEELKTVTNNLKSLEAQAEKYSQKEDKYEIEIKVLSDKLKEAETRAE 240
SP|sp|P58772|TPM1_RABIT|ERAELSEGKCAELEELKTVTNNLKSLEAQAEKYSQKEDKYEIEIKVLSDKLKEAETRAE 240
SP|sp|P04692|TPM1_RAT|ERAELSEGKCAELEELKTVTNNLKSLEAQAEKYSQKEDKYEIEIKVLSDKLKEAETRAE 240
SP|sp|Q5KR49|TPM1_BOVIN|ERAELSEGKCAELEELKTVTNNLKSLEAQAEKYSQKEDKYEIEIKVLSDKLKEAETRAE 240
*****

SP|sp|P42639|TPM1_PIG|FAERSVTKLEKSIDDELEDELYAQKLYKAISEELDHALNDMTSI 284
SP|sp|P09493|TPM1_HUMAN|FAERSVTKLEKSIDDELEDELYAQKLYKAISEELDHALNDMTSI 284
SP|sp|P58771|TPM1_MOUSE|FAERSVTKLEKSIDDELEDELYAQKLYKAISEELDHALNDMTSI 284
SP|sp|P58772|TPM1_RABIT|FAERSVTKLEKSIDDELEDELYAQKLYKAISEELDHALNDMTSI 284
SP|sp|P04692|TPM1_RAT|FAERSVTKLEKSIDDELEDELYAQKLYKAISEELDHALNDMTSI 284
SP|sp|Q5KR49|TPM1_BOVIN|FAERSVTKLEKSIDDELEDELYAQKLYKAISEELDHALNDMTSI 284
*****

```

**Supplementary Figure 6. Protein sequence homology alignment of  $\alpha$ -Tm encoded by gene *TPM1*.** The highlighted area in purple indicates different amino acid sequences across the  $\alpha$ -Tm chains between mouse and human (UniprotKB/Swiss-Prot database). Asterisks indicate the conserved sequence regions. The four common amino acid substitutions were highlighted in purple rectangles (for R38→Q and P64→L) and orange ovals (for G52→A and K220→R), respectively.

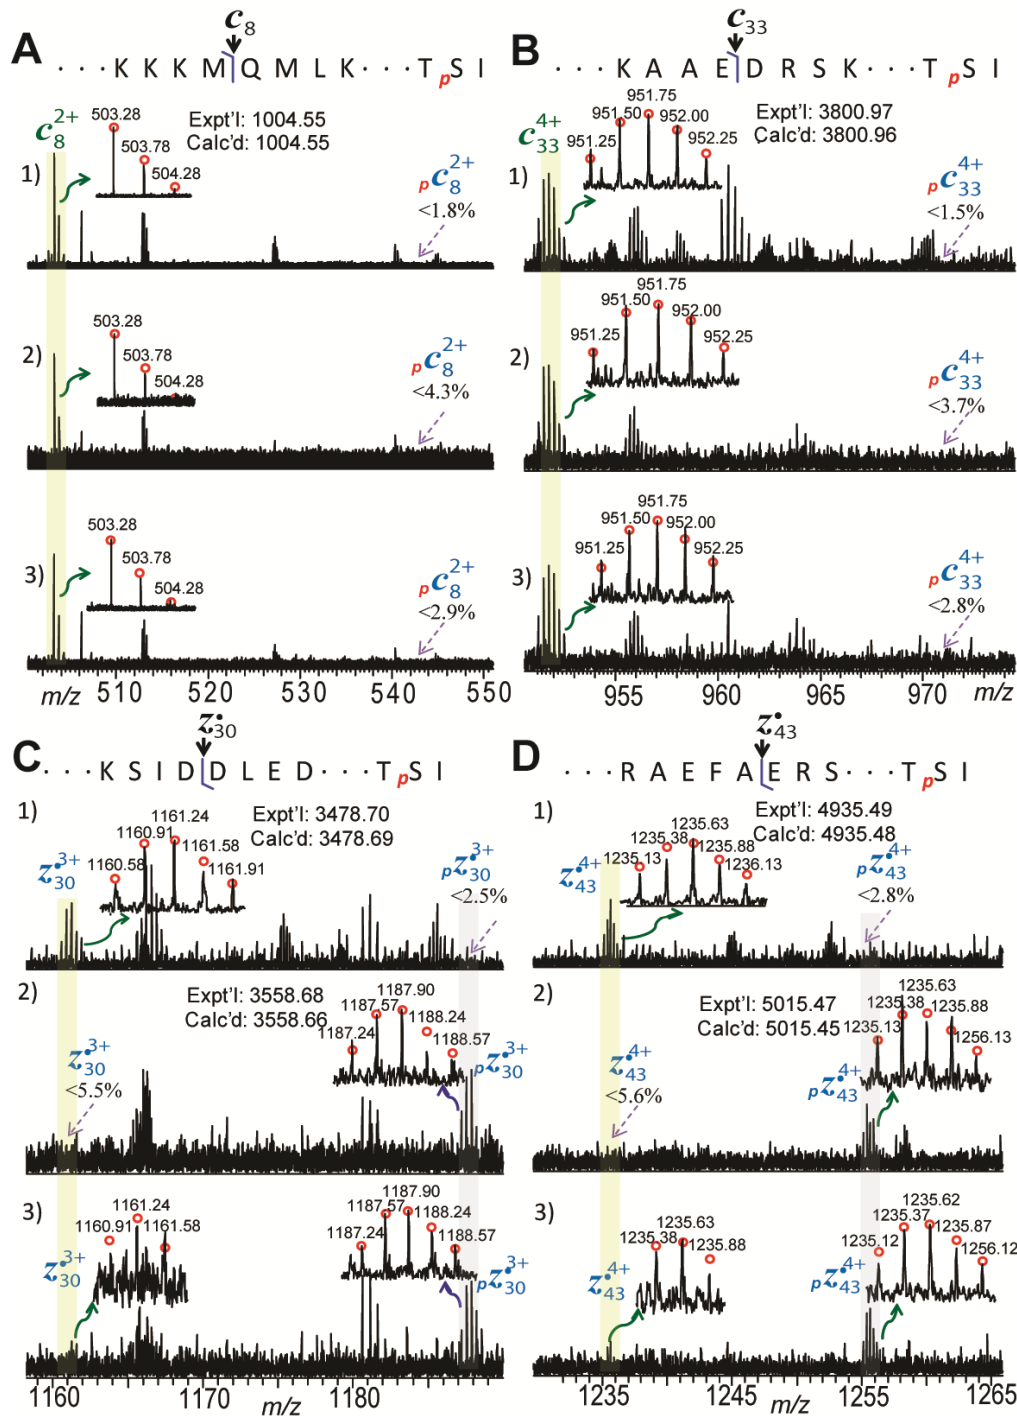

**Supplemental Figure 7. Representative ECD fragment ions for mapping the mono-phosphorylation site of swine  $\alpha$ -Tm.** (A)-(D), MS/MS spectra of  $c$  and  $z'$  ions from ECD spectra of (1) un-, (2) mono-phosphorylated Tm, and (3) mixture of un-phosphorylated (phosphoric acid adduct) and mono-phosphorylated swine Tm. Circles: the theoretical isotopic distribution of isotopomer peaks. Calc'd, calculated most abundant molecular weight. Expt'l, experimental most abundant molecular weight.

# A

```
TR|A1X899|A1X899_PIG|MDAIKKKMOMLKLDKENAIDRAEQAEADKKQAEDRCKQLEEEQQALQKKLKGTEDEVEKY 60
SP|P58774|TPM2_MOUSE|MDAIKKKMOMLKLDKENAIDRAEQAEADKKQAEDRCKQLEEEQQALQKKLKGTEDEVEKY 60
SP|P07951|TPM2_HUMAN|MDAIKKKMOMLKLDKENAIDRAEQAEADKKQAEDRCKQLEEEQQALQKKLKGTEDEVEKY 60
*****

TR|A1X899|A1X899_PIG|SESVKDAQEKLEQAEKKATDAEADVASLNRRIQLVEEELDRAQERLATALQKLEEAEAKAA 120
SP|P58774|TPM2_MOUSE|SESVKDAQEKLEQAEKKATDAEADVASLNRRIQLVEEELDRAQERLATALQKLEEAEAKAA 120
SP|P07951|TPM2_HUMAN|SESVKDAQEKLEQAEKKATDAEADVASLNRRIQLVEEELDRAQERLATALQKLEEAEAKAA 120
*****

TR|A1X899|A1X899_PIG|DESERGMKVIENRAMKDEEKMELOEMQLKEAKHIAEDSDRKYEEVARKLVILEGELE 180
SP|P58774|TPM2_MOUSE|DESERGMKVIENRAMKDEEKMELOEMQLKEAKHIAEDSDRKYEEVARKLVILEGELE 177
SP|P07951|TPM2_HUMAN|DESERGMKVIENRAMKDEEKMELOEMQLKEAKHIAEDSDRKYEEVARKLVILEGELE 177
*****

TR|A1X899|A1X899_PIG|RSEERAEAVAESKCGDLEELKIVTNNLKSLEAQADKYSTKEDKYEEIKLLEEKLKEAET 240
SP|P58774|TPM2_MOUSE|RSEERAEAVAESKCGDLEELKIVTNNLKSLEAQADKYSTKEDKYEEIKLLEEKLKEAET 237
SP|P07951|TPM2_HUMAN|RSEERAEAVAESKCGDLEELKIVTNNLKSLEAQADKYSTKEDKYEEIKLLEEKLKEAET 237
*****

TR|A1X899|A1X899_PIG|RAEFAERSVAKLEKTIDDLEETLASAKENVEIHQTLDQTLLLELNNL 287
SP|P58774|TPM2_MOUSE|RAEFAERSVAKLEKTIDDLEEVYAQKMKYKAISEELDNALNDITSL 284
SP|P07951|TPM2_HUMAN|RAEFAERSVAKLEKTIDDLEEVYAQKMKYKAISEELDNALNDITSL 284
*****
```

# B

TR|A1X899|A1X899\_PIG: TPM2

```
SP|P58774|TPM2_MOUSE|MDAIKKKMOMLKLDKENAIDRAEQAEADKKQAEDRCKQLEEEQQALQKKLKGTEDEVEKY 60
SP|P07951|TPM2_HUMAN|MDAIKKKMOMLKLDKENAIDRAEQAEADKKQAEDRCKQLEEEQQALQKKLKGTEDEVEKY 60
SP|P58775|TPM2_RAT|MDAIKKKMOMLKLDKENAIDRAEQAEADKKQAEDRCKQLEEEQQALQKKLKGTEDEVEKY 60
SP|P58776|TPM2_RABIT|MDAIKKKMOMLKLDKENAIDRAEQAEADKKQAEDRCKQLEEEQQALQKKLKGTEDEVEKY 60
SP|Q5KR48|TPM2_BOVIN|MDAIKKKMOMLKLDKENAIDRAEQAEADKKQAEDRCKQLEEEQQALQKKLKGTEDEVEKY 60
*****

SP|P58774|TPM2_MOUSE|SESVKDAQEKLEQAEKKATDAEADVASLNRRIQLVEEELDRAQERLATALQKLEEAEAKAA 120
SP|P07951|TPM2_HUMAN|SESVKDAQEKLEQAEKKATDAEADVASLNRRIQLVEEELDRAQERLATALQKLEEAEAKAA 120
SP|P58775|TPM2_RAT|SESVKDAQEKLEQAEKKATDAEADVASLNRRIQLVEEELDRAQERLATALQKLEEAEAKAA 120
SP|P58776|TPM2_RABIT|SESVKDAQEKLEQAEKKATDAEADVASLNRRIQLVEEELDRAQERLATALQKLEEAEAKAA 120
SP|Q5KR48|TPM2_BOVIN|SESVKDAQEKLEQAEKKATDAEADVASLNRRIQLVEEELDRAQERLATALQKLEEAEAKAA 120
*****

SP|P58774|TPM2_MOUSE|DESERGMKVIENRAMKDEEKMELOEMQLKEAKHIAEDSDRKYEEVARKLVILEGELERSE 180
SP|P07951|TPM2_HUMAN|DESERGMKVIENRAMKDEEKMELOEMQLKEAKHIAEDSDRKYEEVARKLVILEGELERSE 180
SP|P58775|TPM2_RAT|DESERGMKVIENRAMKDEEKMELOEMQLKEAKHIAEDSDRKYEEVARKLVILEGELERSE 180
SP|P58776|TPM2_RABIT|DESERGMKVIENRAMKDEEKMELOEMQLKEAKHIAEDSDRKYEEVARKLVILEGELERSE 180
SP|Q5KR48|TPM2_BOVIN|DESERGMKVIENRAMKDEEKMELOEMQLKEAKHIAEDSDRKYEEVARKLVILEGELERSE 180
*****

SP|P58774|TPM2_MOUSE|ERAEAVAESKCGDLEELKIVTNNLKSLEAQADKYSTKEDKYEEIKLLEEKLKEAETRAE 240
SP|P07951|TPM2_HUMAN|ERAEAVAESKCGDLEELKIVTNNLKSLEAQADKYSTKEDKYEEIKLLEEKLKEAETRAE 240
SP|P58775|TPM2_RAT|ERAEAVAESKCGDLEELKIVTNNLKSLEAQADKYSTKEDKYEEIKLLEEKLKEAETRAE 240
SP|P58776|TPM2_RABIT|ERAEAVAESKCGDLEELKIVTNNLKSLEAQADKYSTKEDKYEEIKLLEEKLKEAETRAE 240
SP|Q5KR48|TPM2_BOVIN|ERAEAVAESKCGDLEELKIVTNNLKSLEAQADKYSTKEDKYEEIKLLEEKLKEAETRAE 240
*****

SP|P58774|TPM2_MOUSE|FAERSVAKLEKTIDDLEEVYAQKMKYKAISEELDNALNDITSL 284
SP|P07951|TPM2_HUMAN|FAERSVAKLEKTIDDLEEVYAQKMKYKAISEELDNALNDITSL 284
SP|P58775|TPM2_RAT|FAERSVAKLEKTIDDLEEVYAQKMKYKAISEELDNALNDITSL 284
SP|P58776|TPM2_RABIT|FAERSVAKLEKTIDDLEEVYAQKMKYKAISEELDNALNDITSL 284
SP|Q5KR48|TPM2_BOVIN|FAERSVAKLEKTIDDLEEVYAQKMKYKAISEELDNALNDITSL 284
*****
```

**Supplementary Figure 8. Protein sequence homology alignment of  $\beta$ -Tm encoded by gene *TPM2*.** The highlighted area in purple indicates different amino acid sequences across the  $\beta$ -Tm chains among various species (UniprotKB/Swiss-Prot database). Asterisks indicate the conserved sequence regions. A1X899\_PIG is encoded by *TPM2* but the sequence is marked as “unreviewed” in the SwissProt database.
